# Supplementary material
Source: publisher figshare collection journal article supplement (https://tandf.figshare.com/ndownloader/files/18541310)
Supplement: Supplementary file 1 [file 18541310]

**Supplementary information**

One-Pot Assembly for synthesis of 1,4-dihydropyridine scaffold and their biological applications.

Mayank G. Sharma†, Juhee Pandya#, Divyang M. Patel†, Ruturajsinh M. Vala†, V. Ramkumar§, Raghunandankumar Subramanian§§, Vivek K. Gupta‡, Ramesh L. Gardas§, Anuradha Dhanasekaran§§ and Hitendra M. Patel †*

† Department of Chemistry, Sardar Patel University, Vallabh Vidyanagar-388120, Gujarat, India,

# Department of Bioscience, Sardar Patel University, Vallabh Vidyanagar-388120, Gujarat, India,

‡ Department of Physics and Electronics, University of Jammu, Jammu Tawi (J&K)-180006.

§ Department of Chemistry, Indian Institute of Technology, Madras, India.

§§ Centre for Biotechnology, Anna University, Chennai-600 025, Tamil Nadu, India

**Table of contents:**

|  | **Selected 1H-NMR spectra** | **2-15** |
| --- | --- | --- |
|  | **Selected 13C-APT spectra** | **16-28** |
|  | **Selected ATR-FTIR spectra** | **29-33** |
|  | **Selected Mass Spectra** | **34-38** |
|  | **Single Crystal Study for compounds 4j, 4k, 4l, 4h and 4o** | **39-40** |
|  | **Experimental section** | **41-50** |

**1. 1H-NMR spectra of Synthesized Compounds 4(a-l):**

**Compound 4a**

**
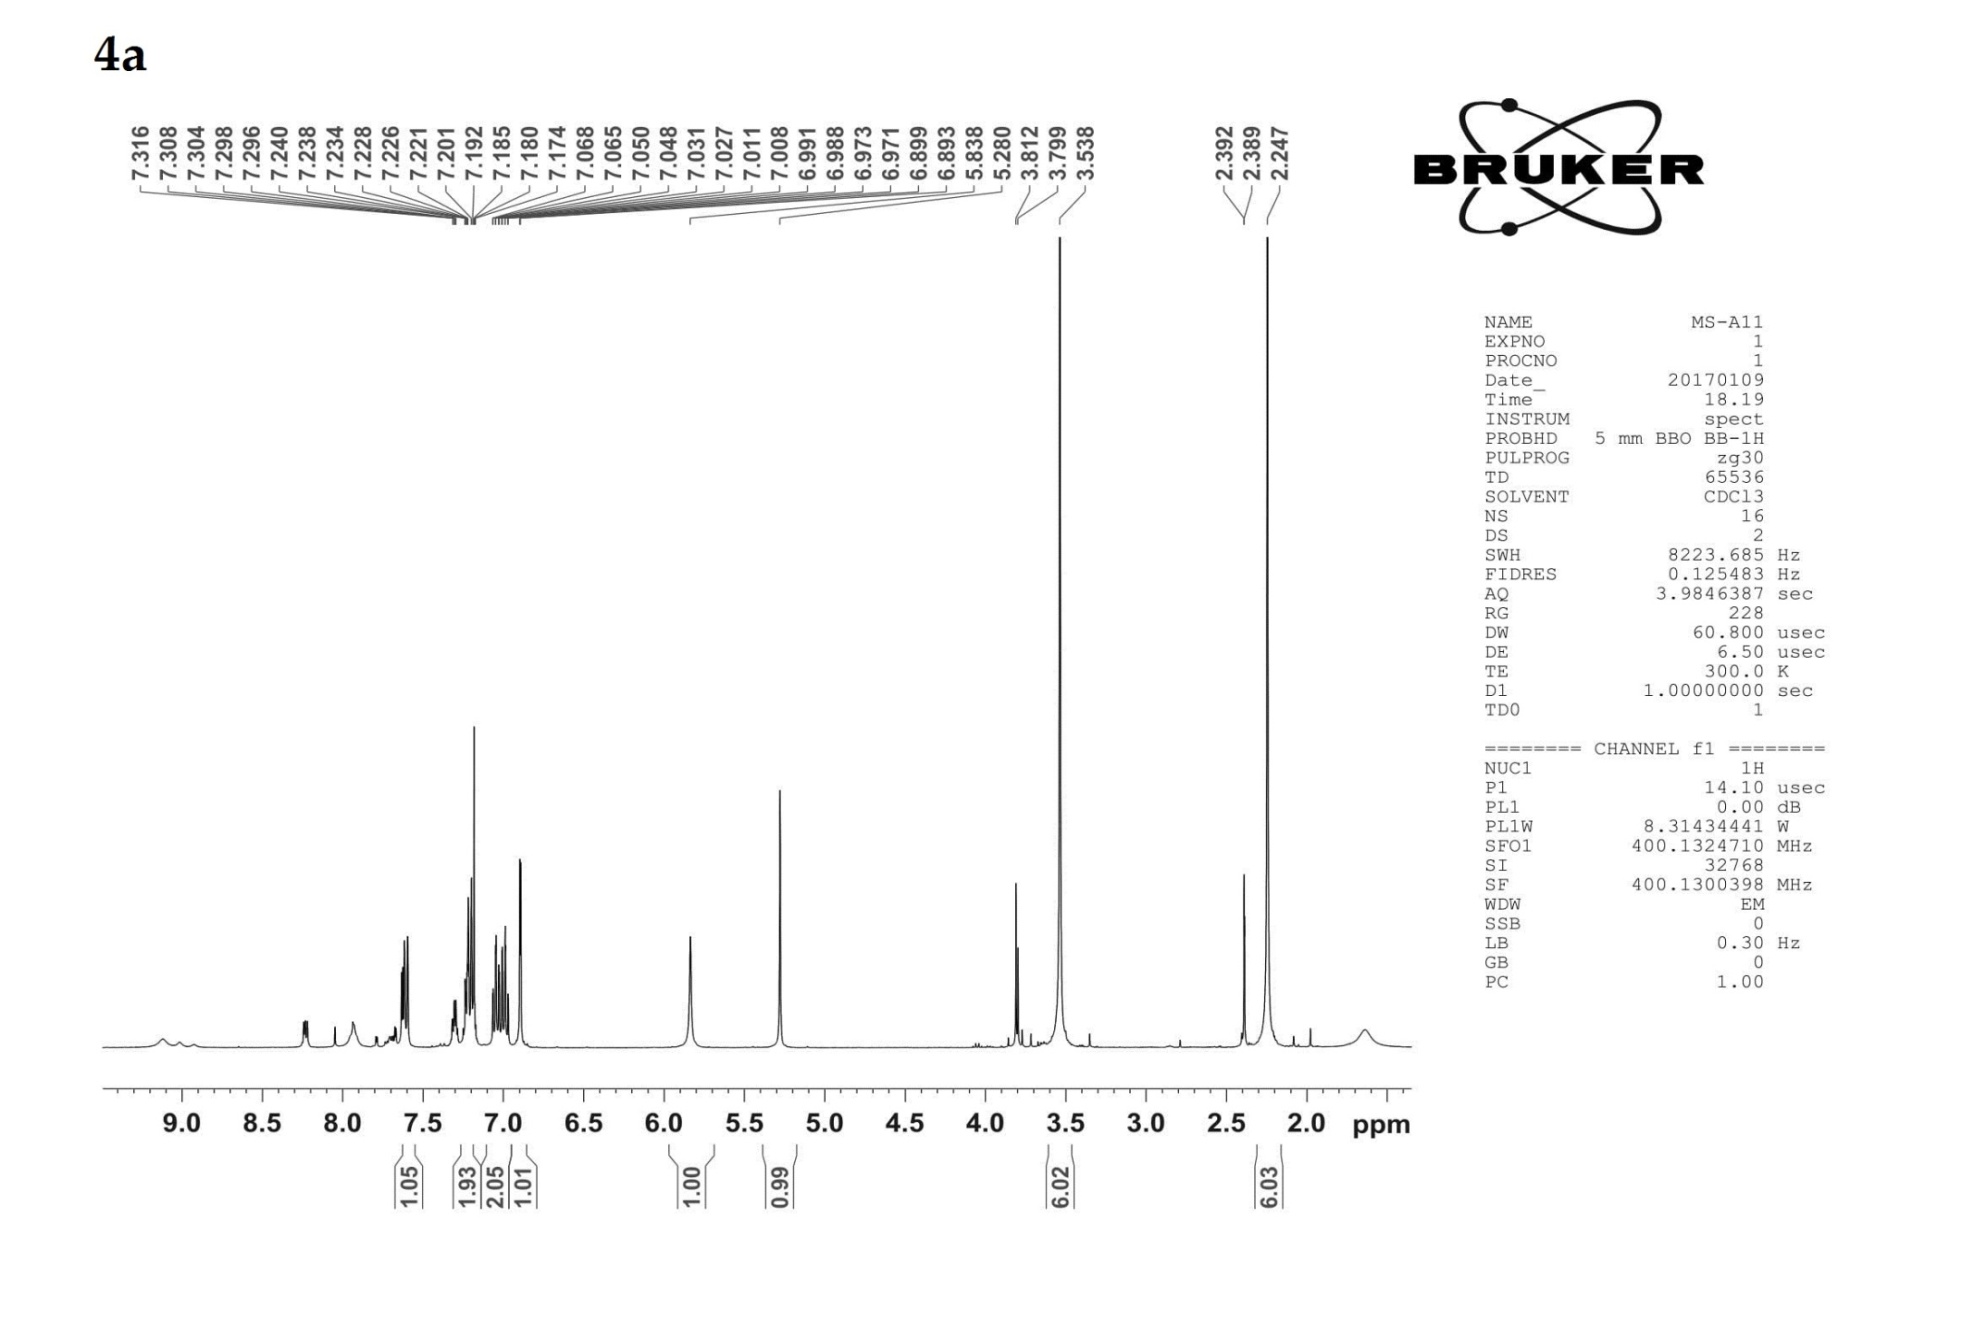
**

**Full range NMR spectrum for compound 4a.**

**
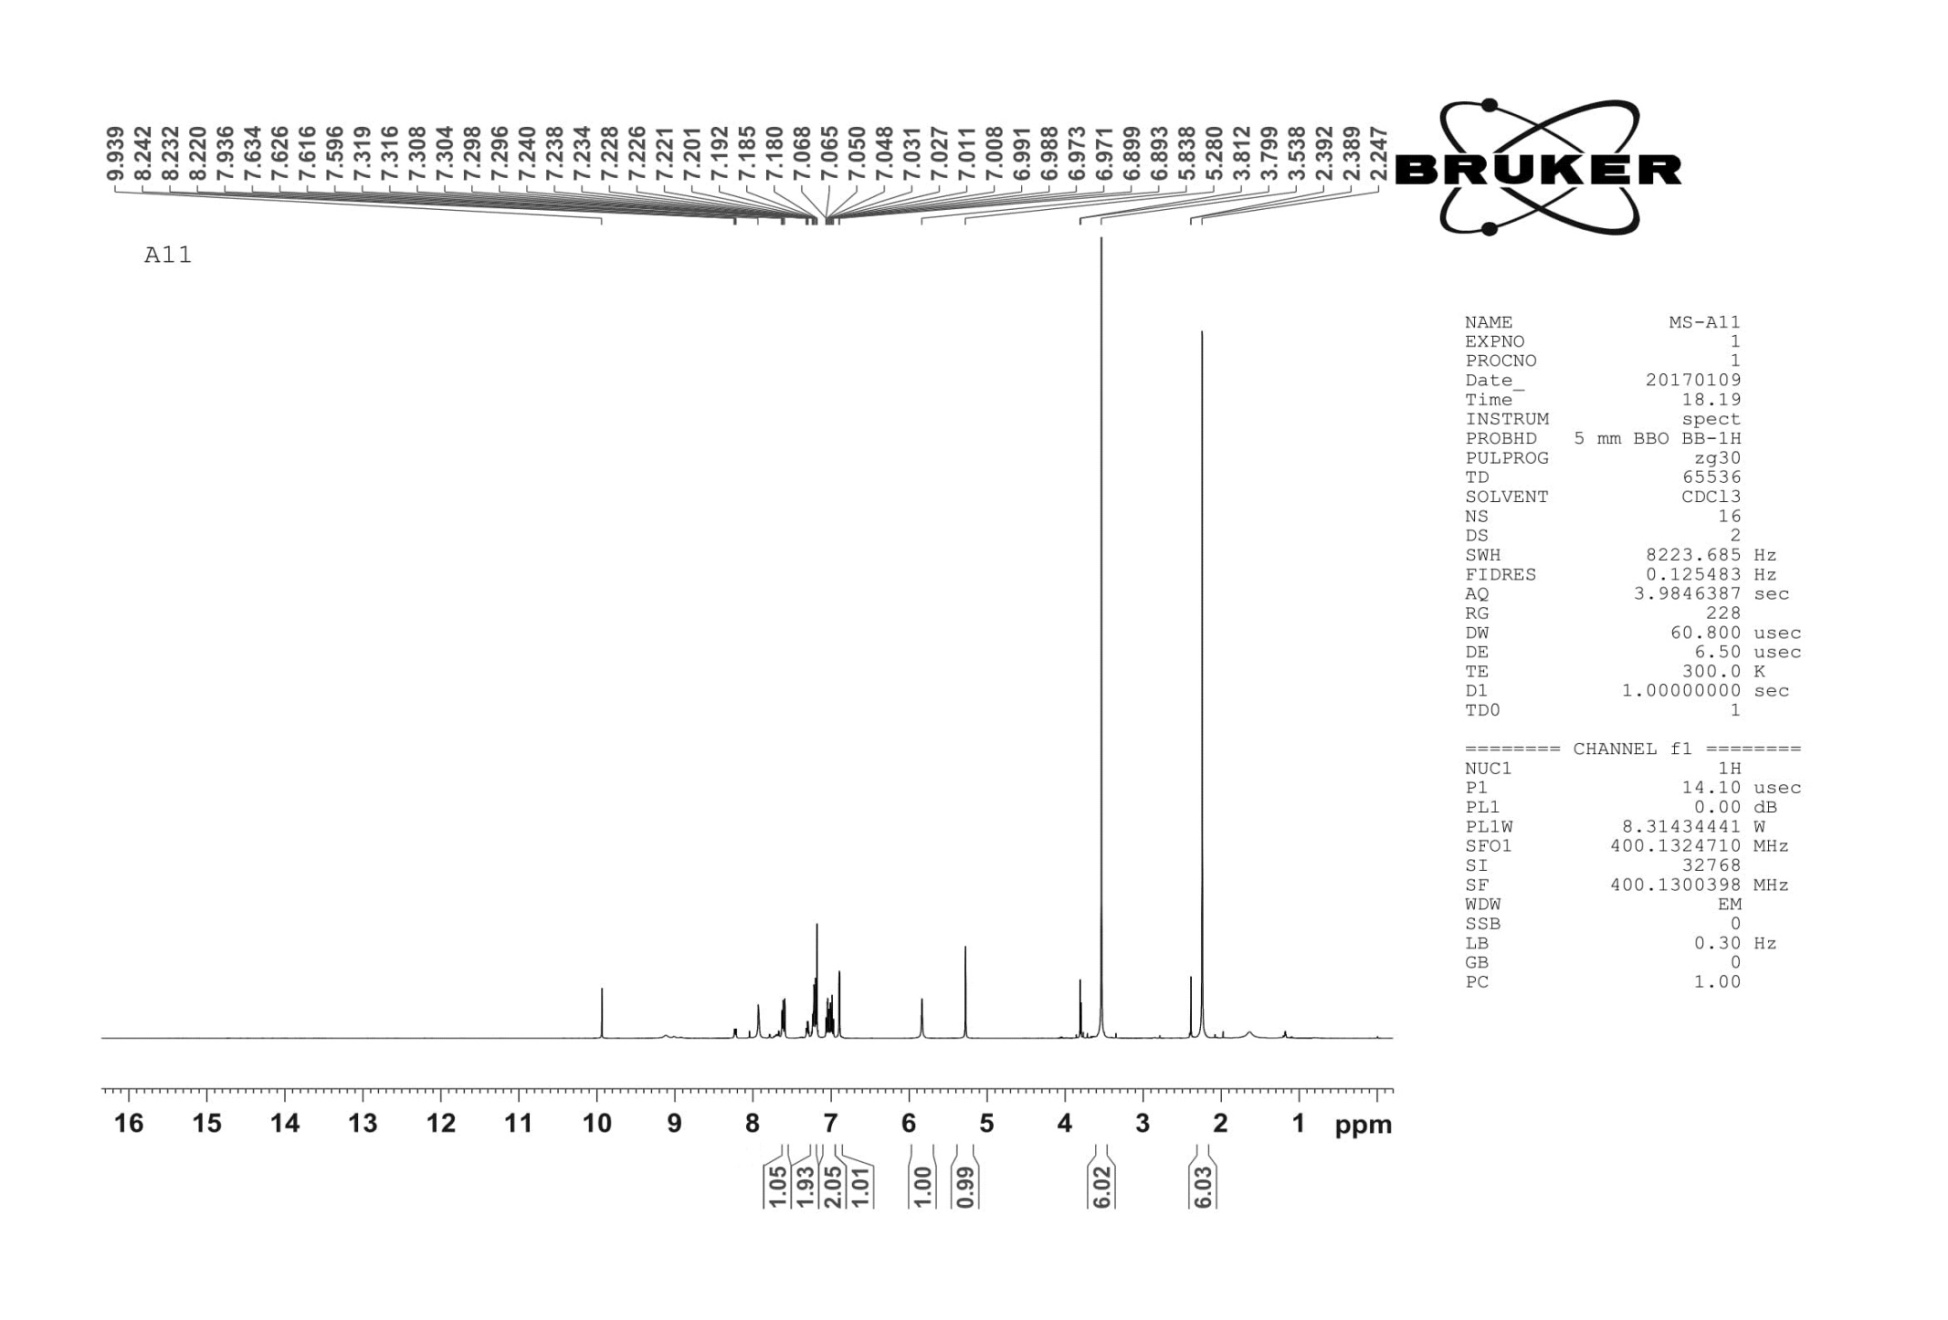
**

**Compound 4b**


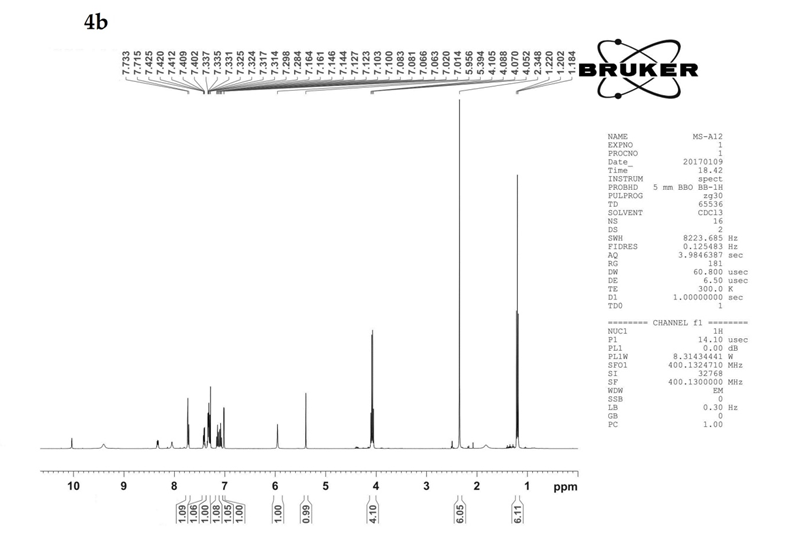


**Compound 4c**


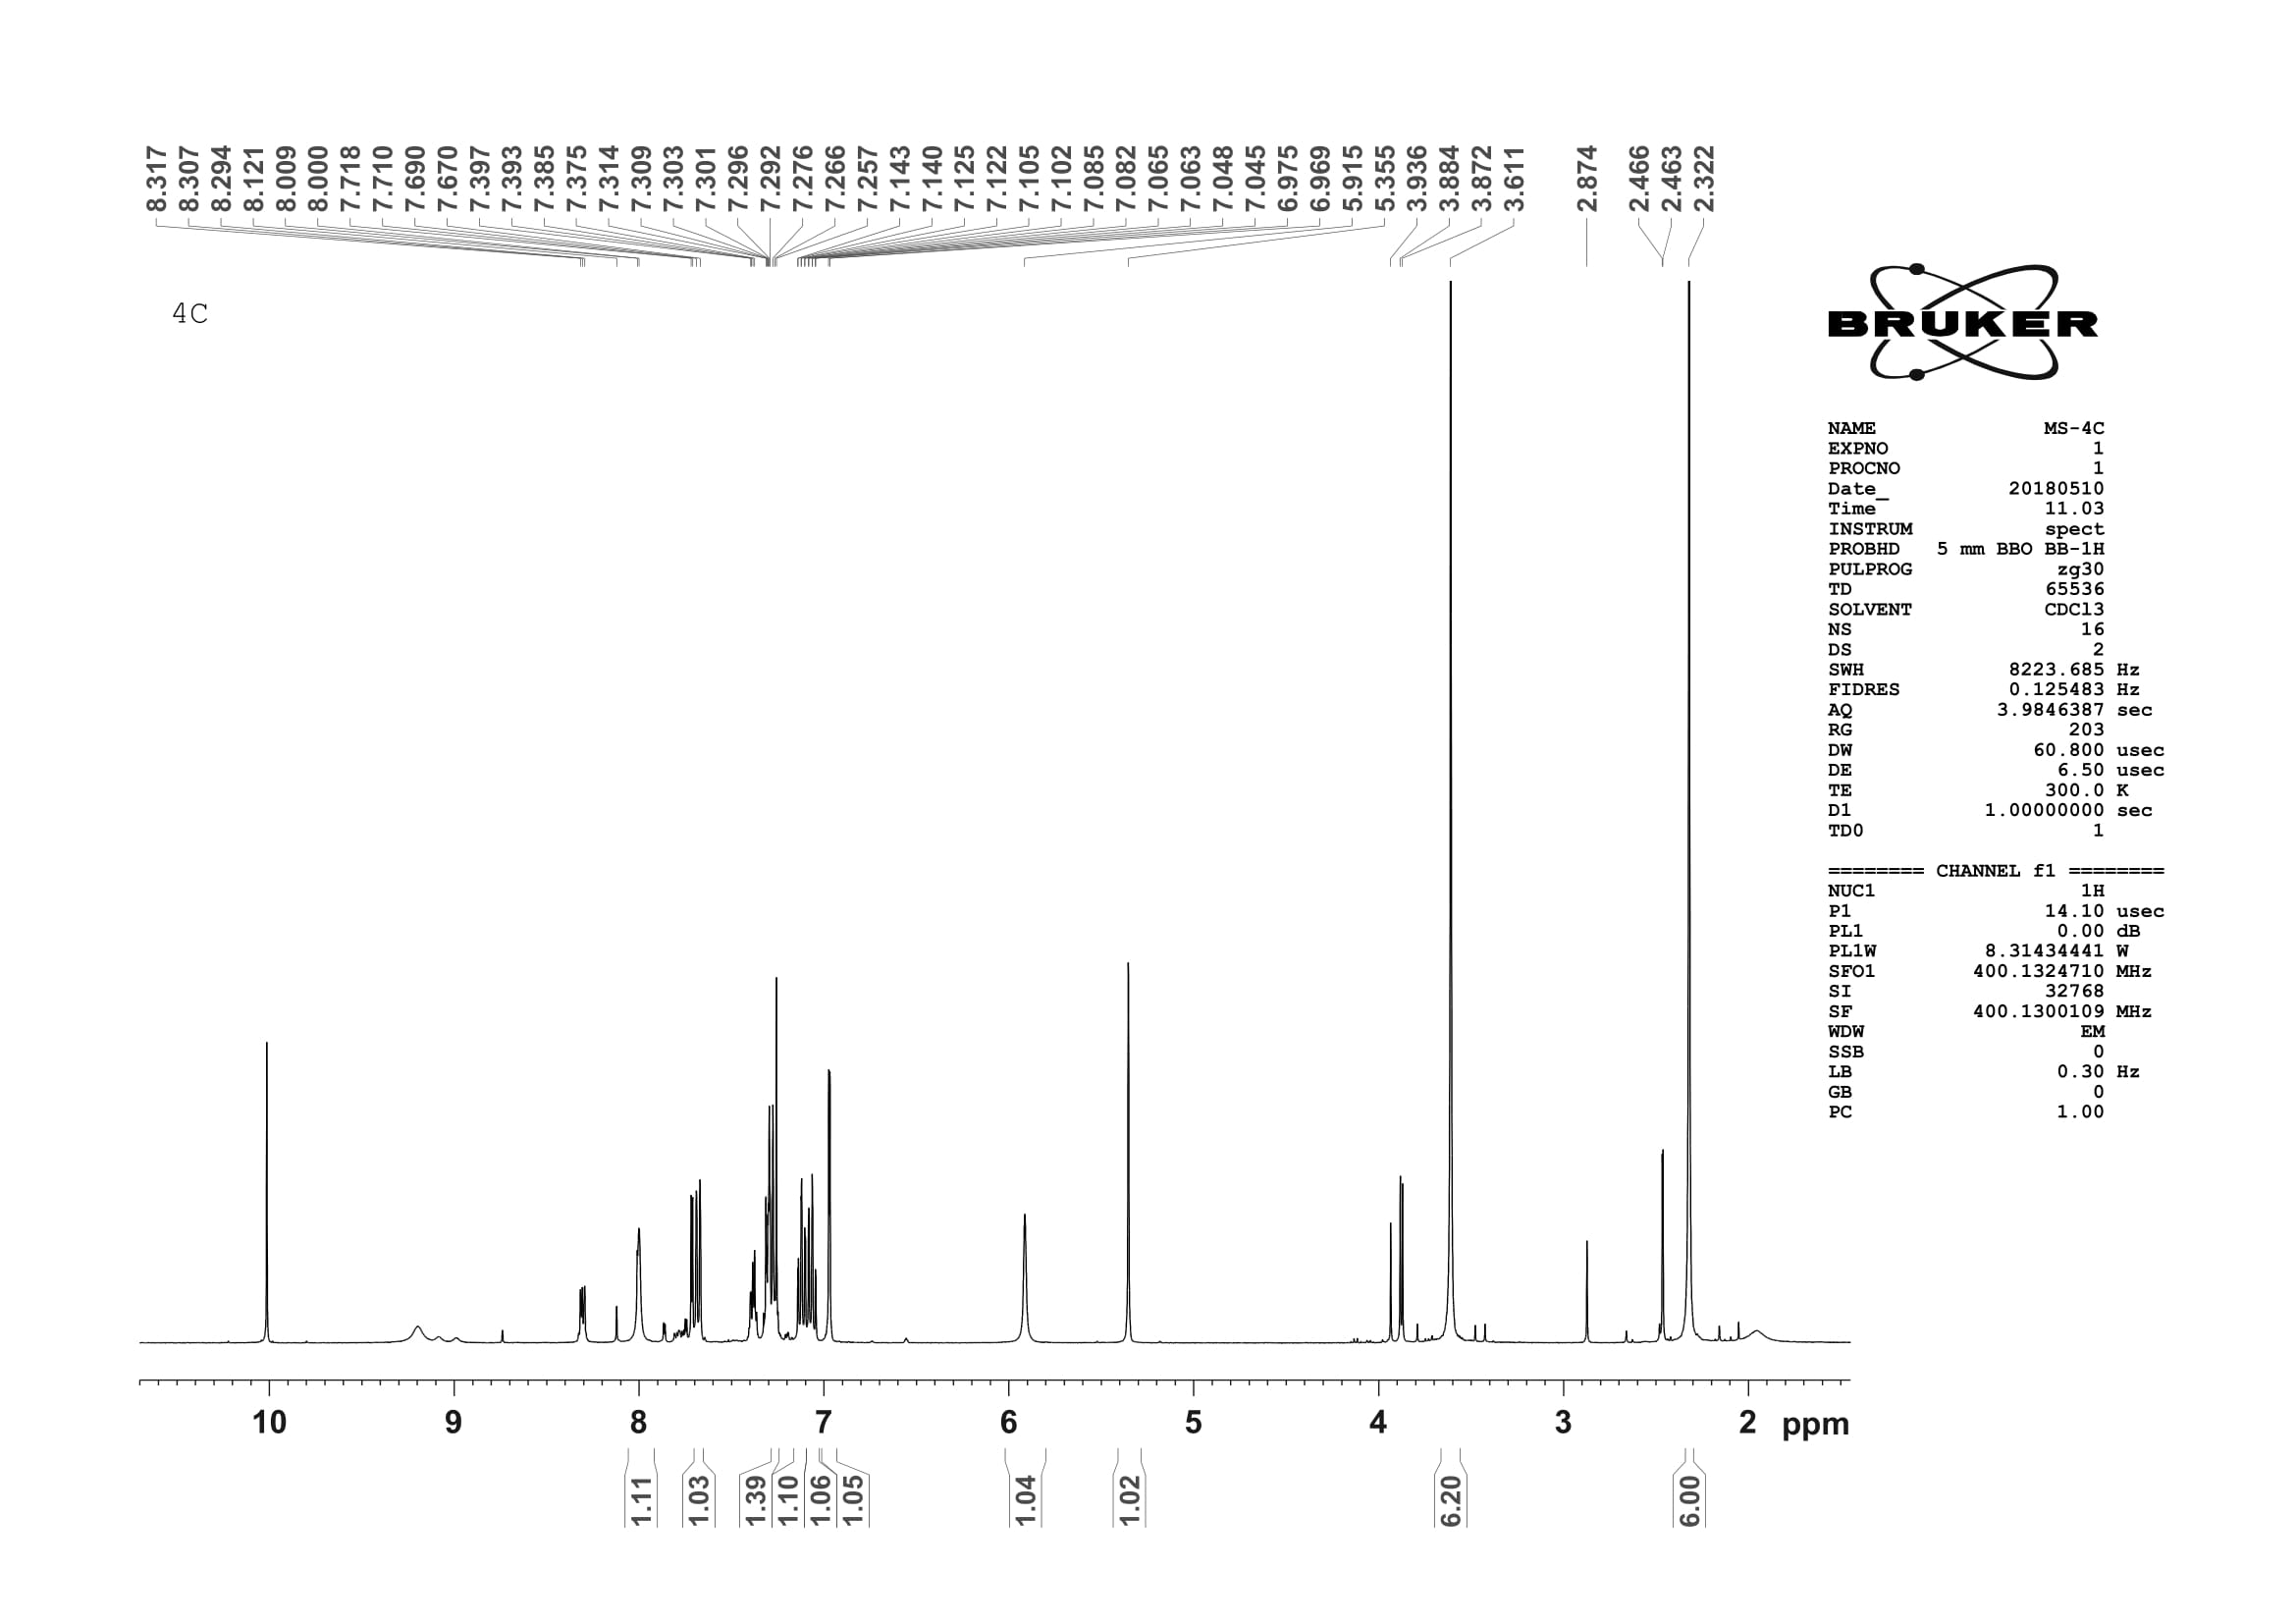


**Compound 4d**

**
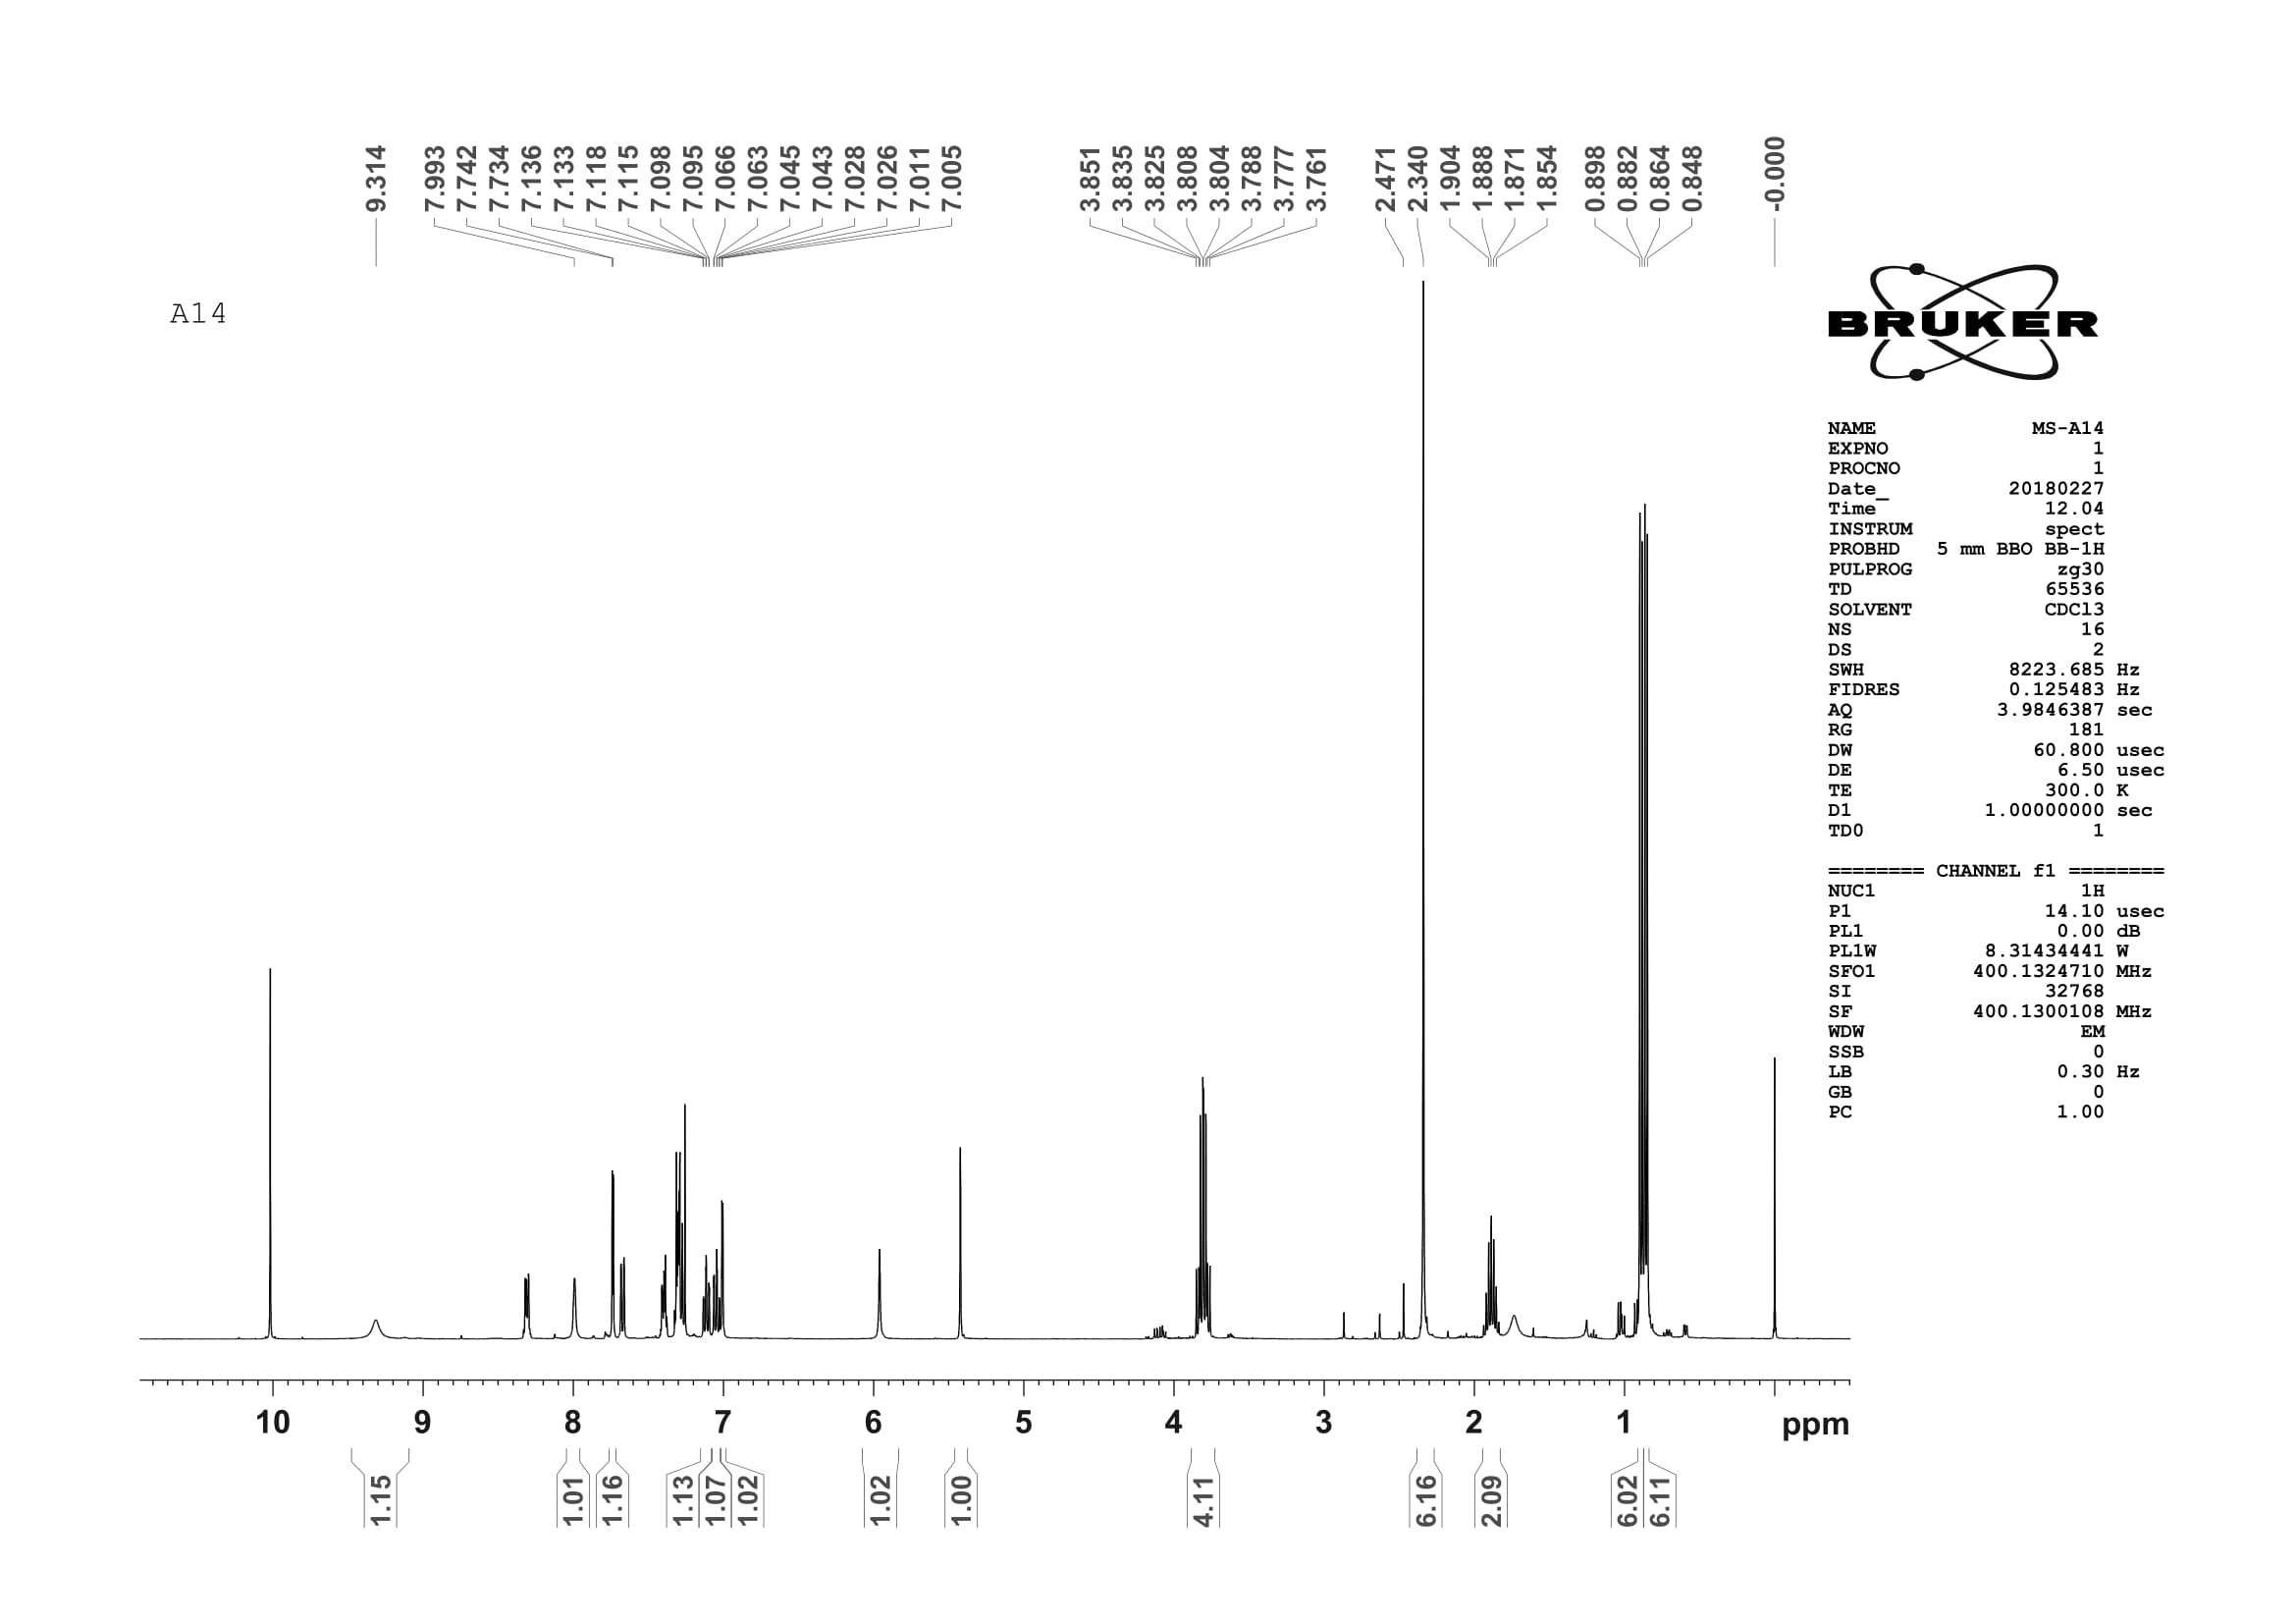
**

**Compound 4e**


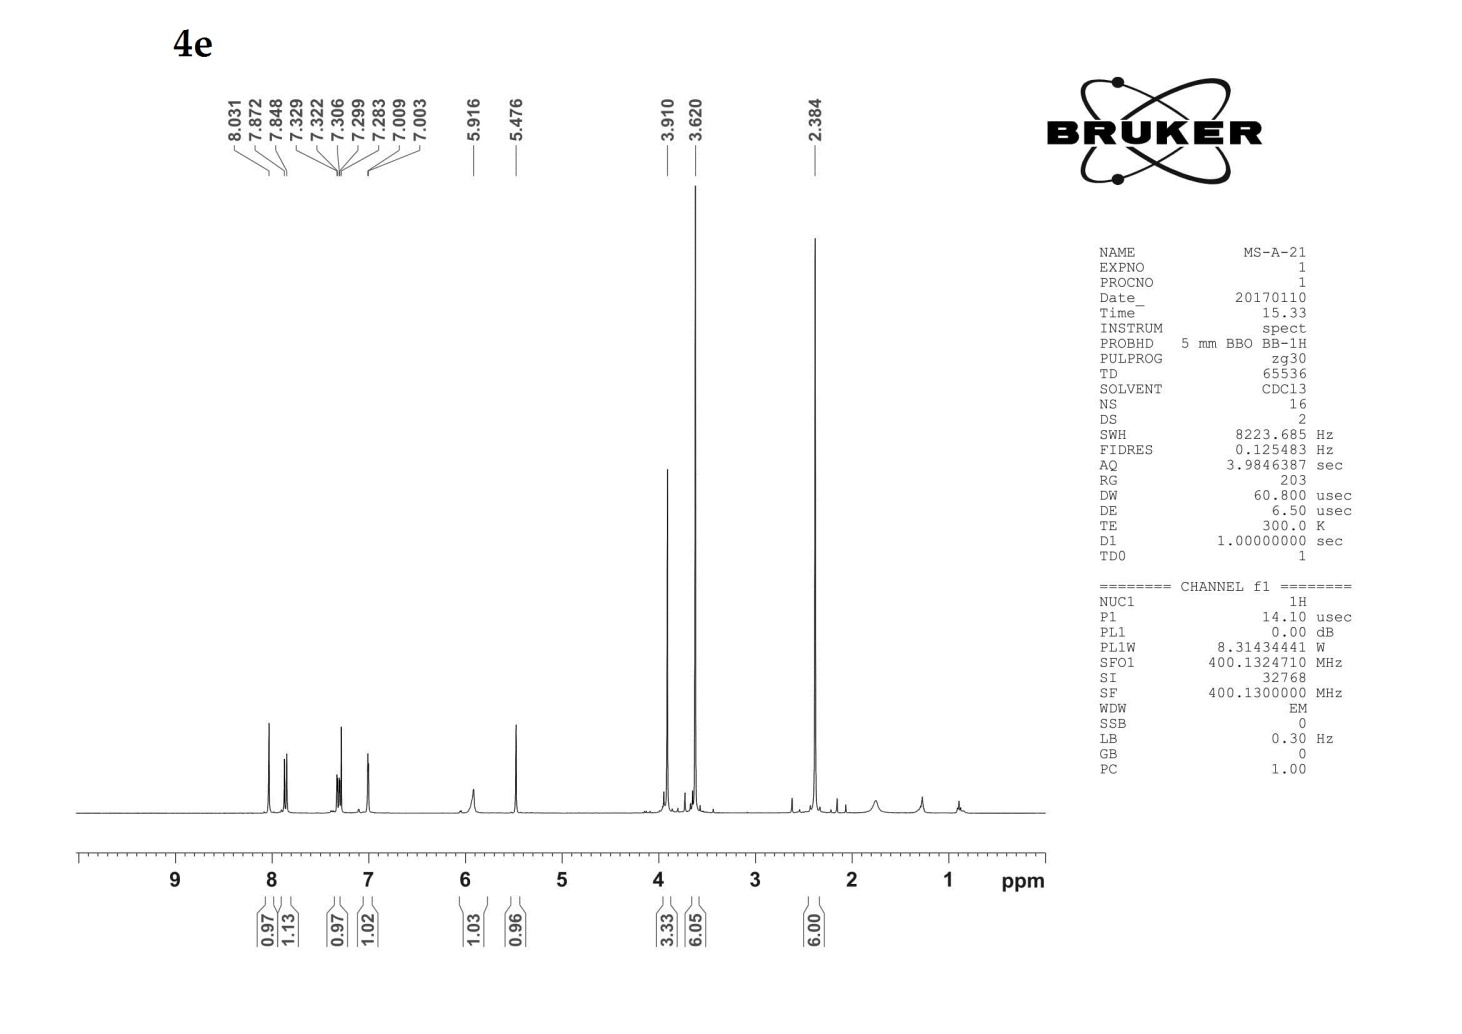


**Compound 4f**


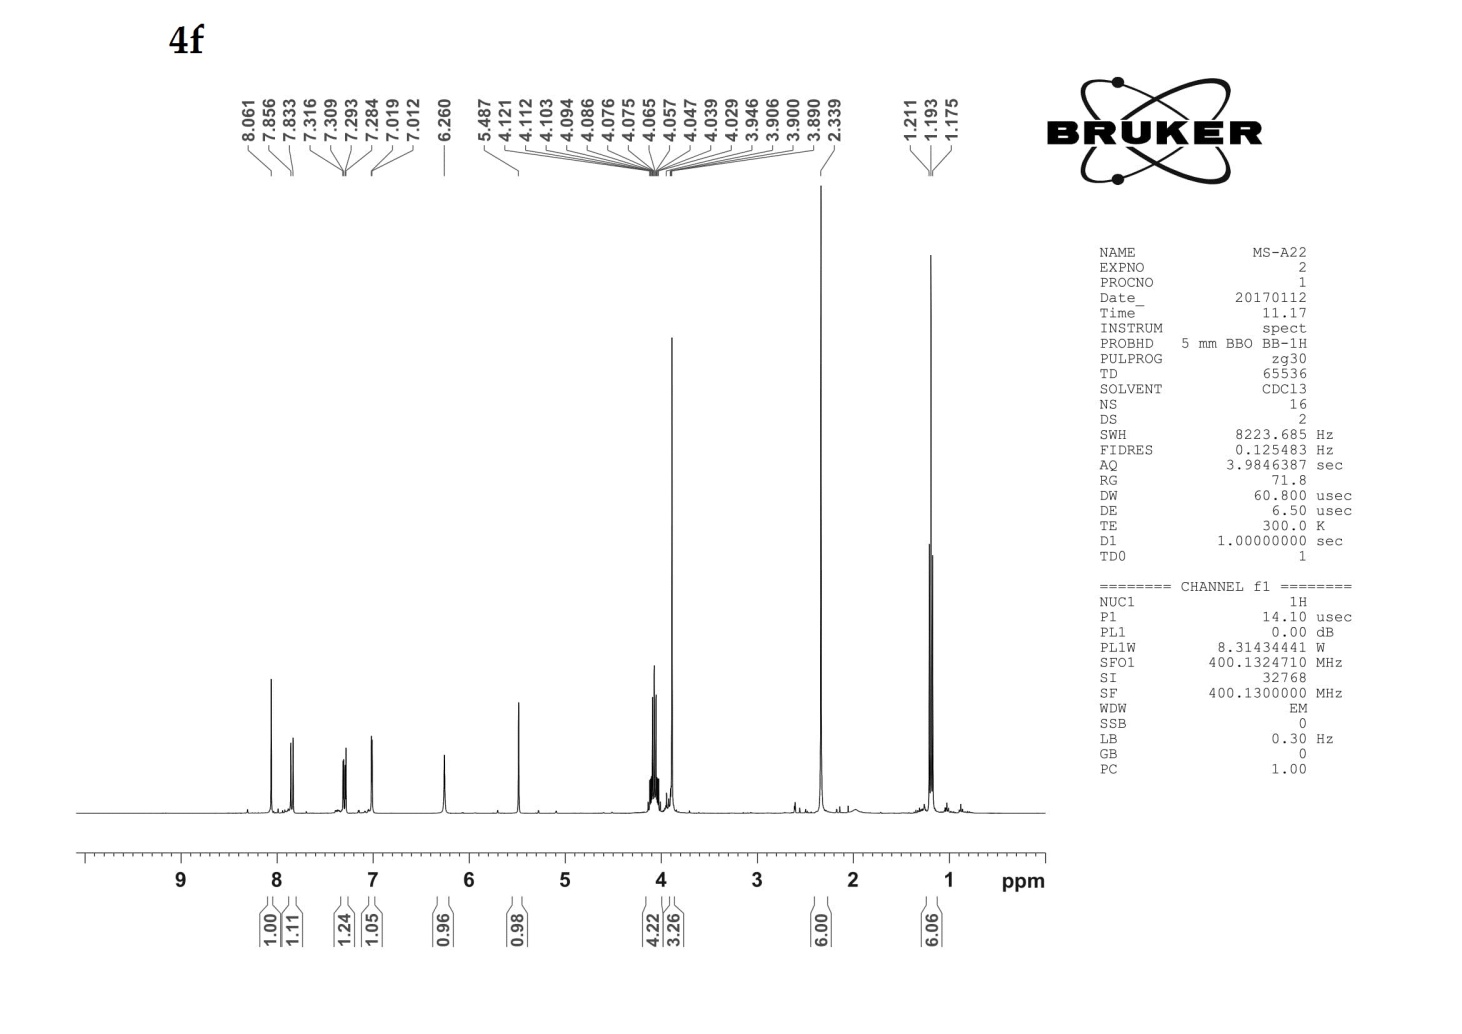


**Compound 4g**


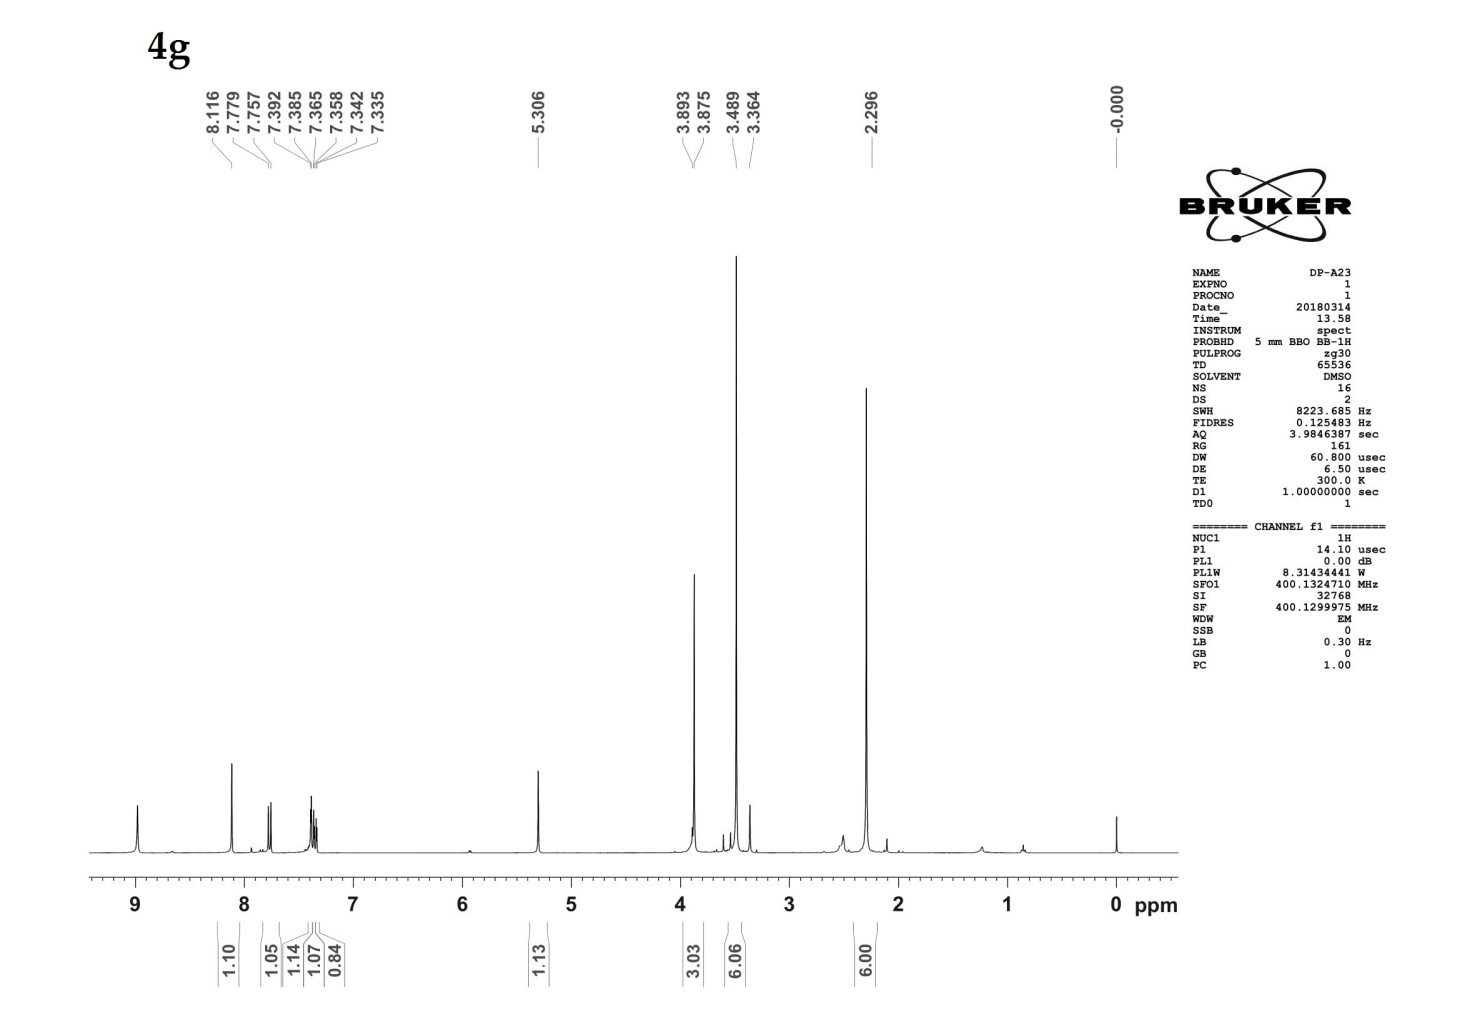


**Compound 4j**


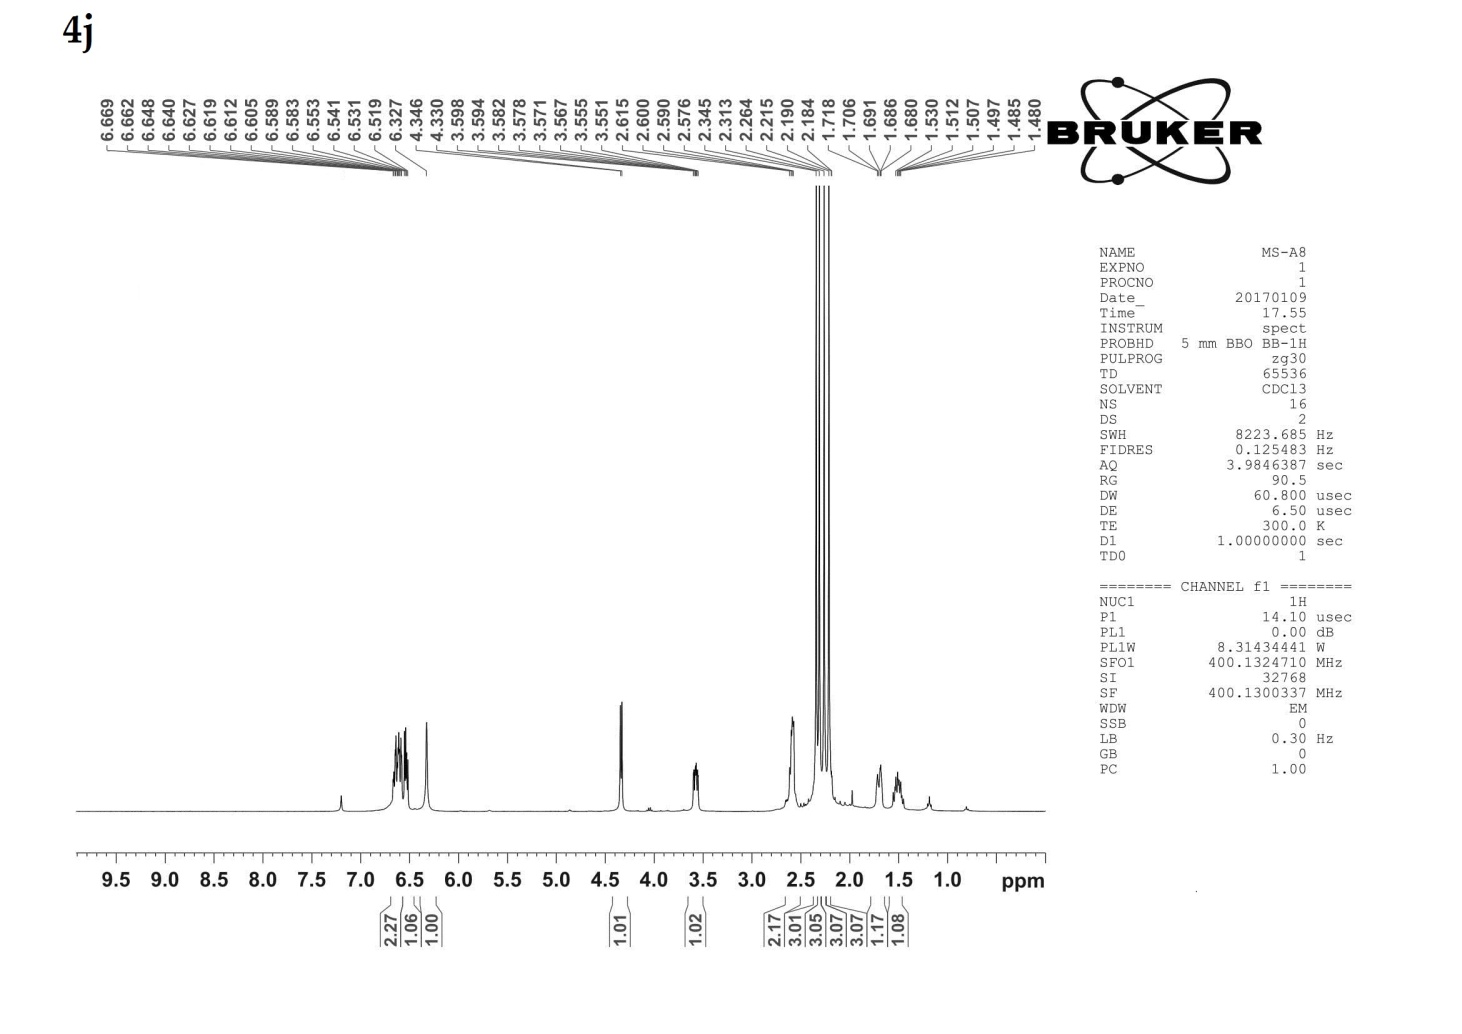


**Compound 4k**

**
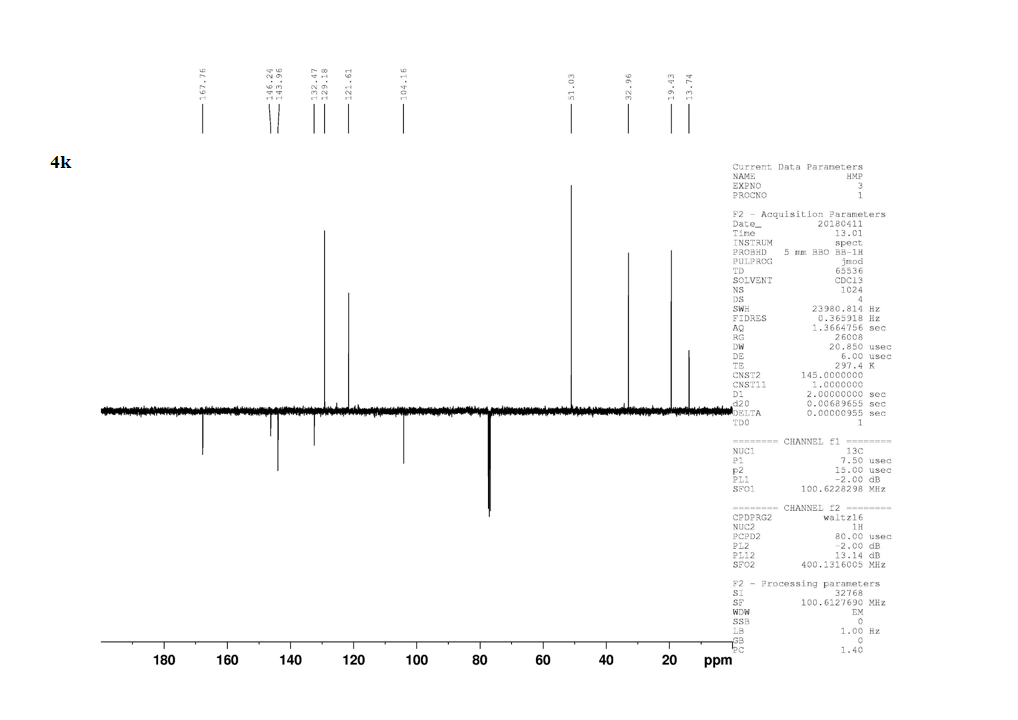
**

**Compound 4l**


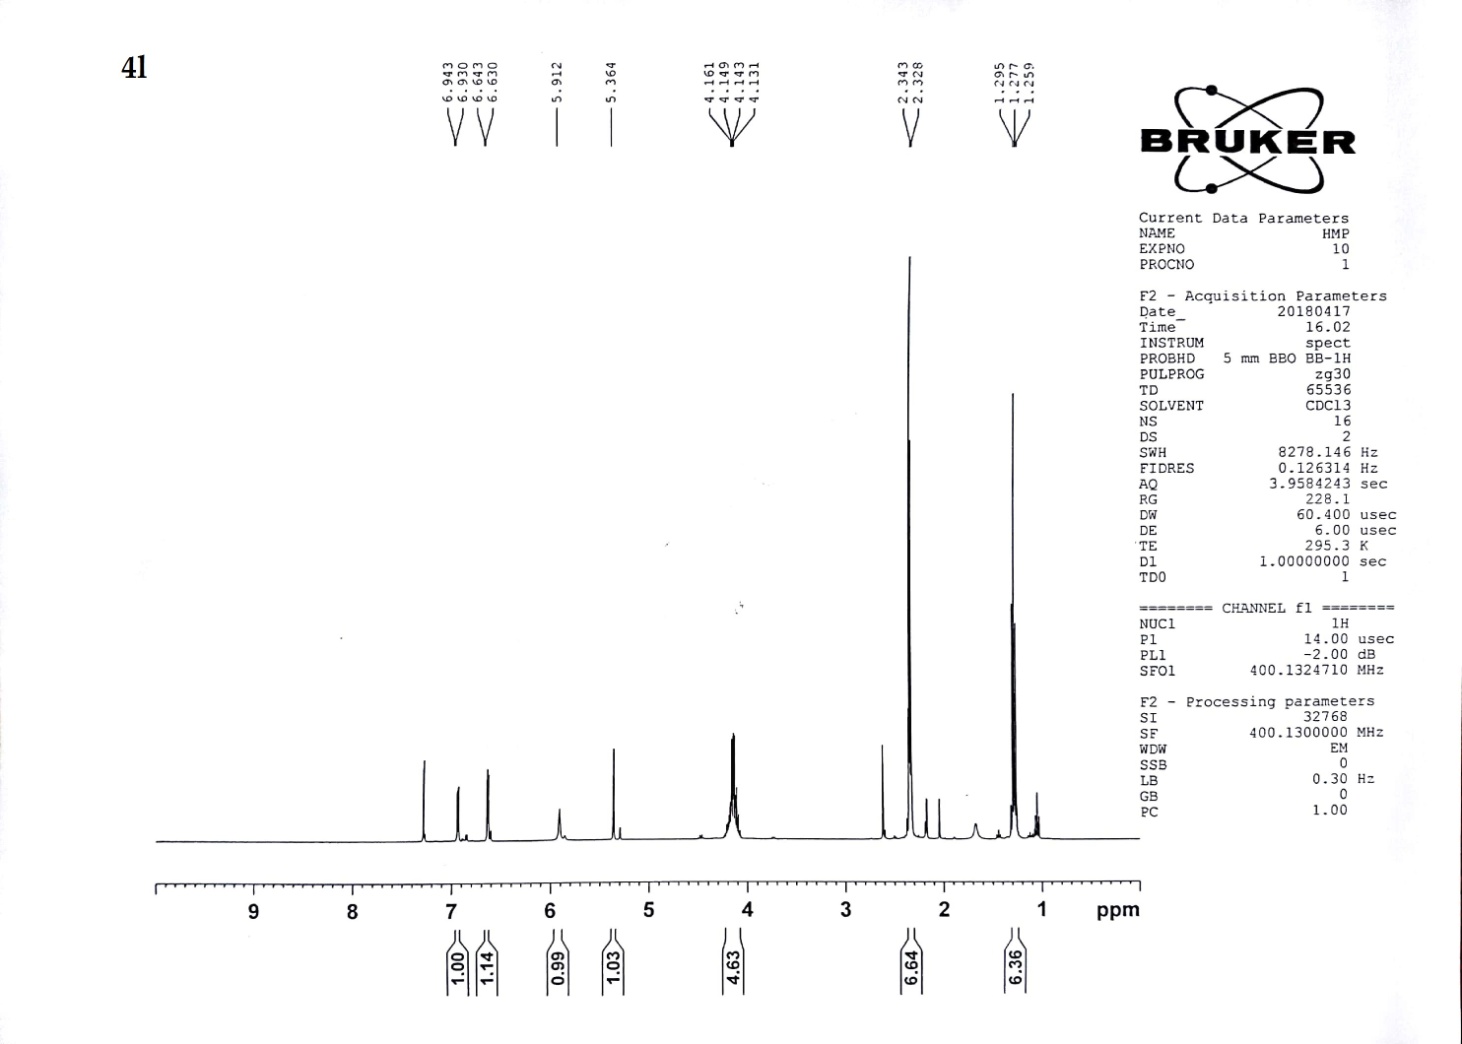


**Compound 4m**


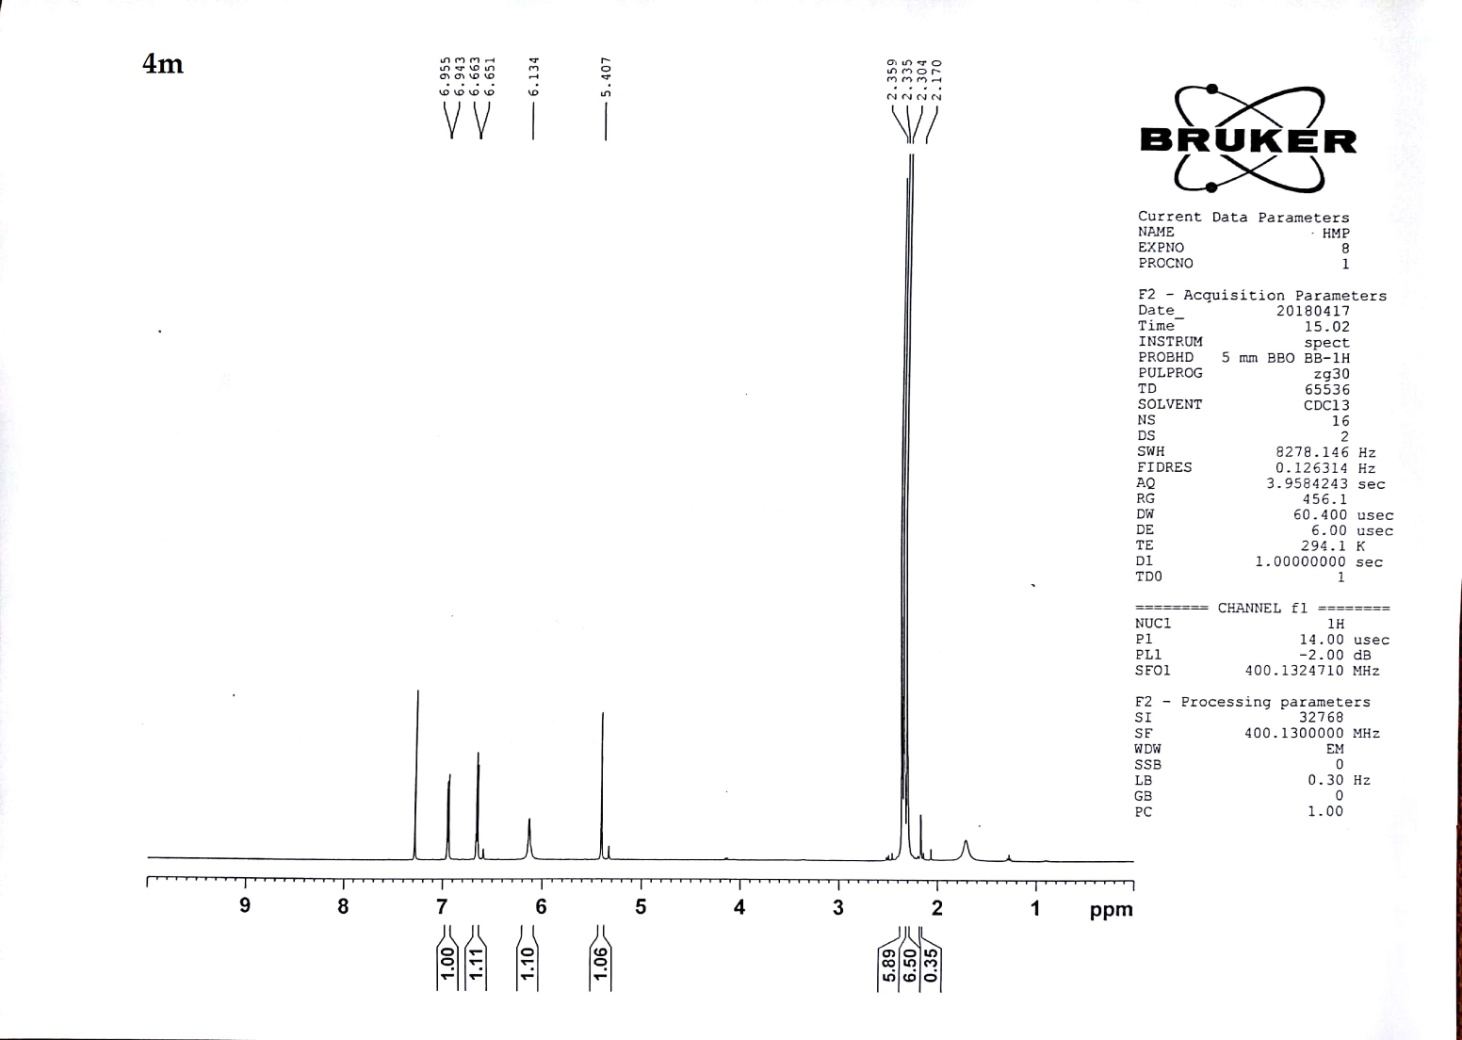


**Compound 4n**


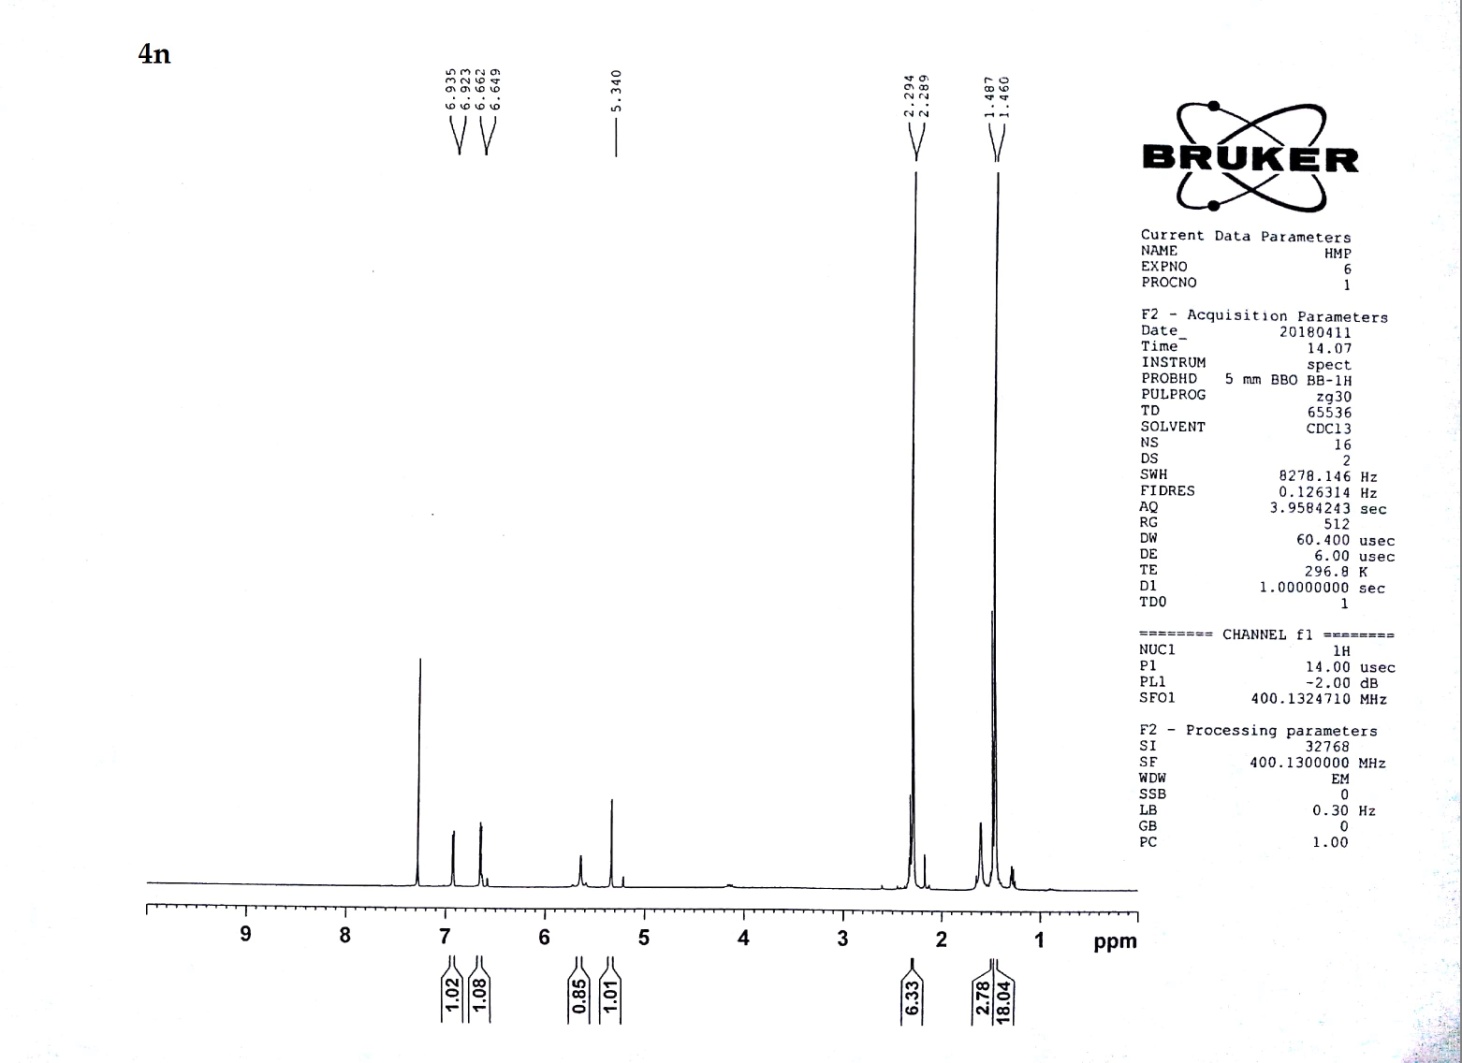


**Compound 4o**

**
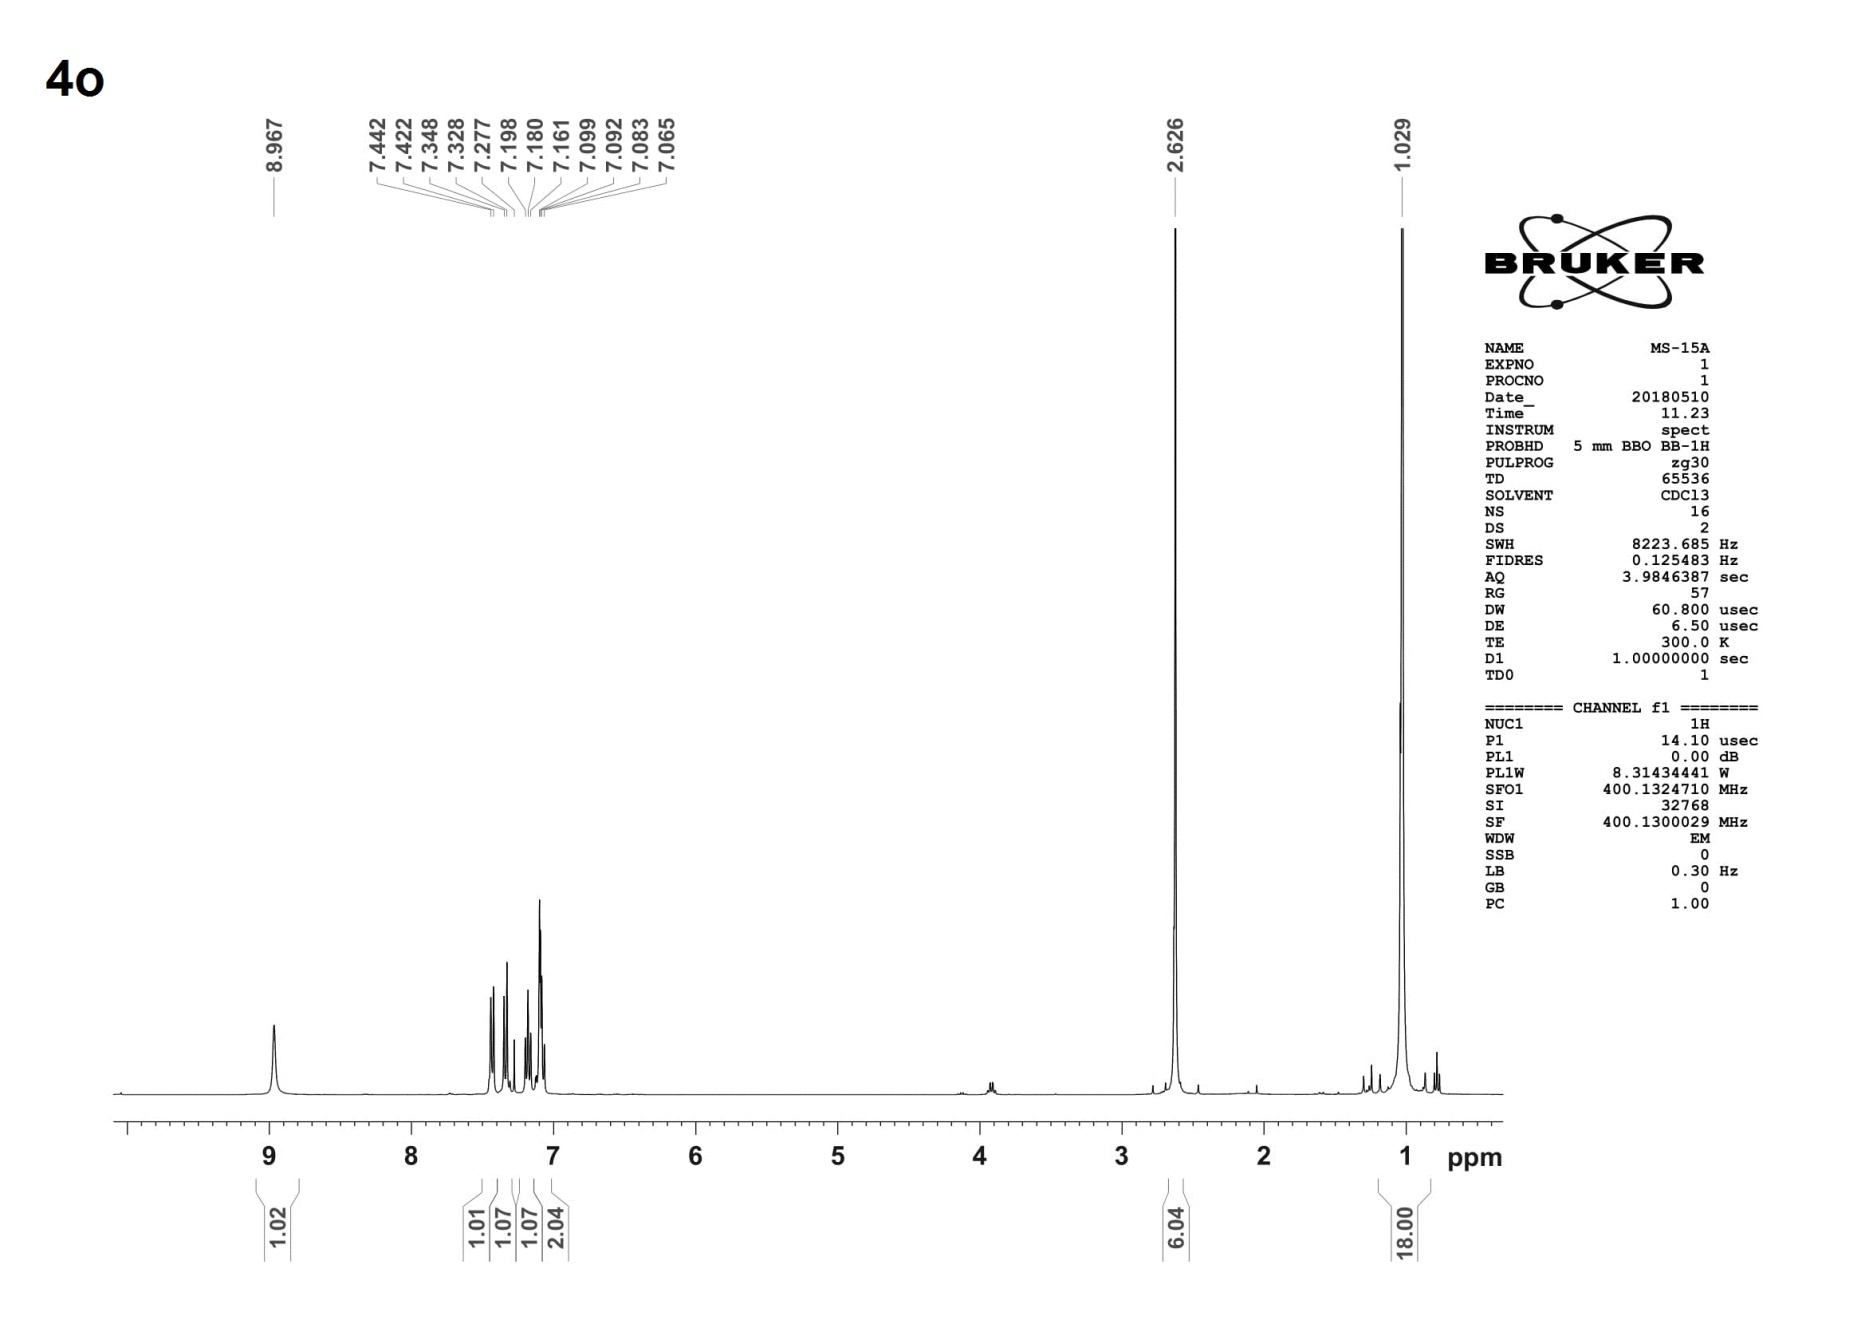
**

**2. 13C-APT spectra of Synthesized Compounds 4(a-l):**


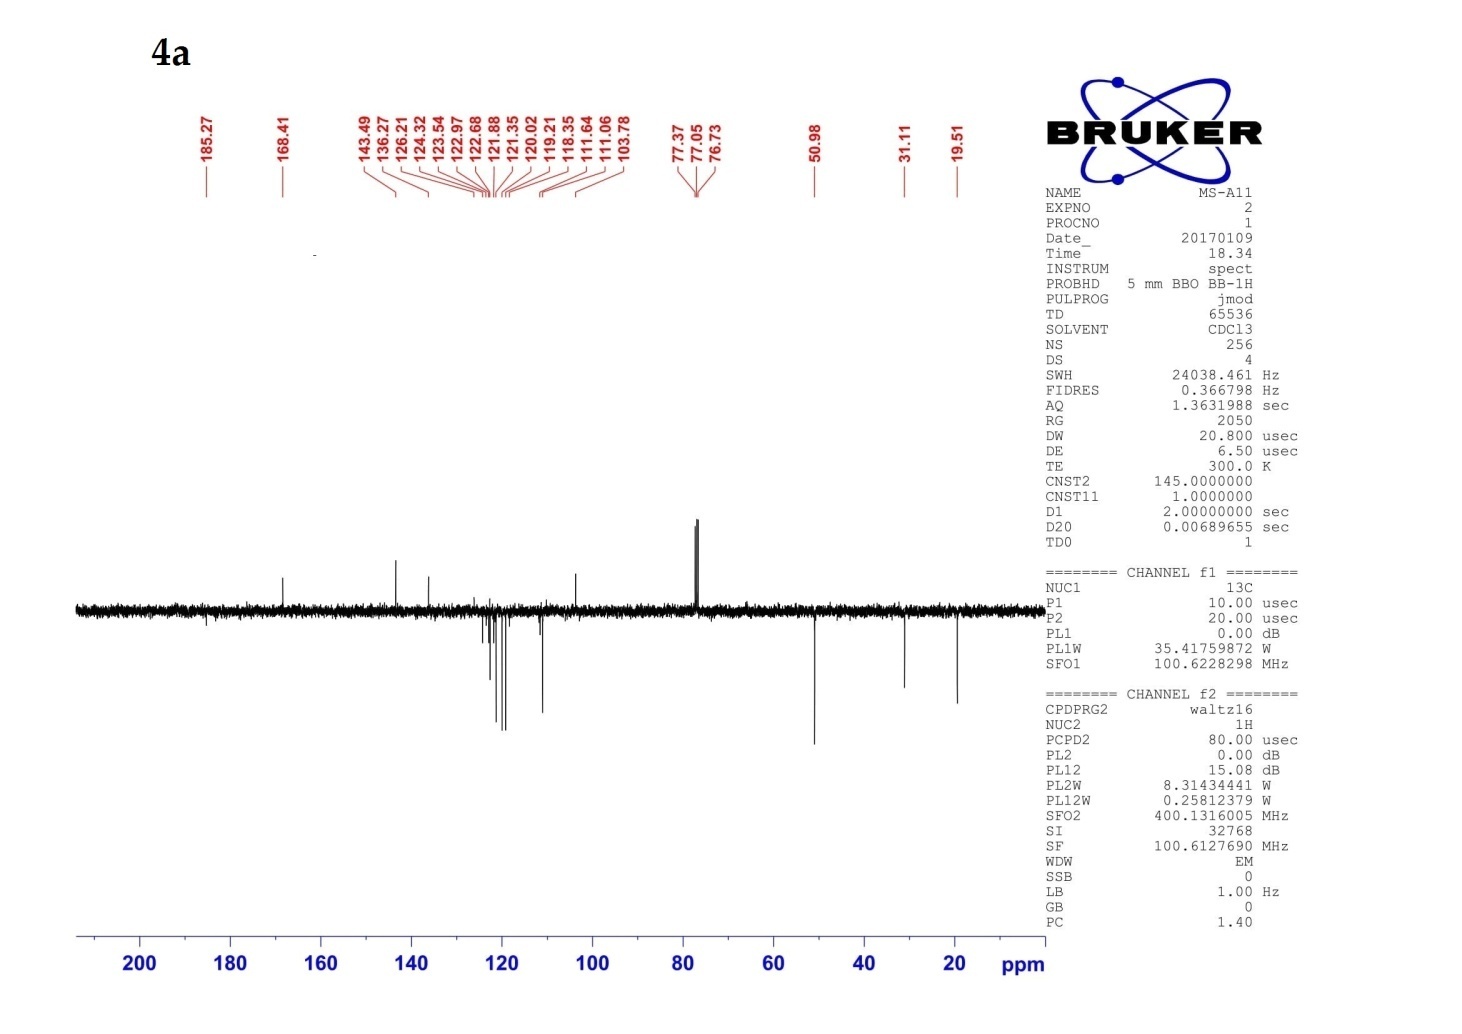


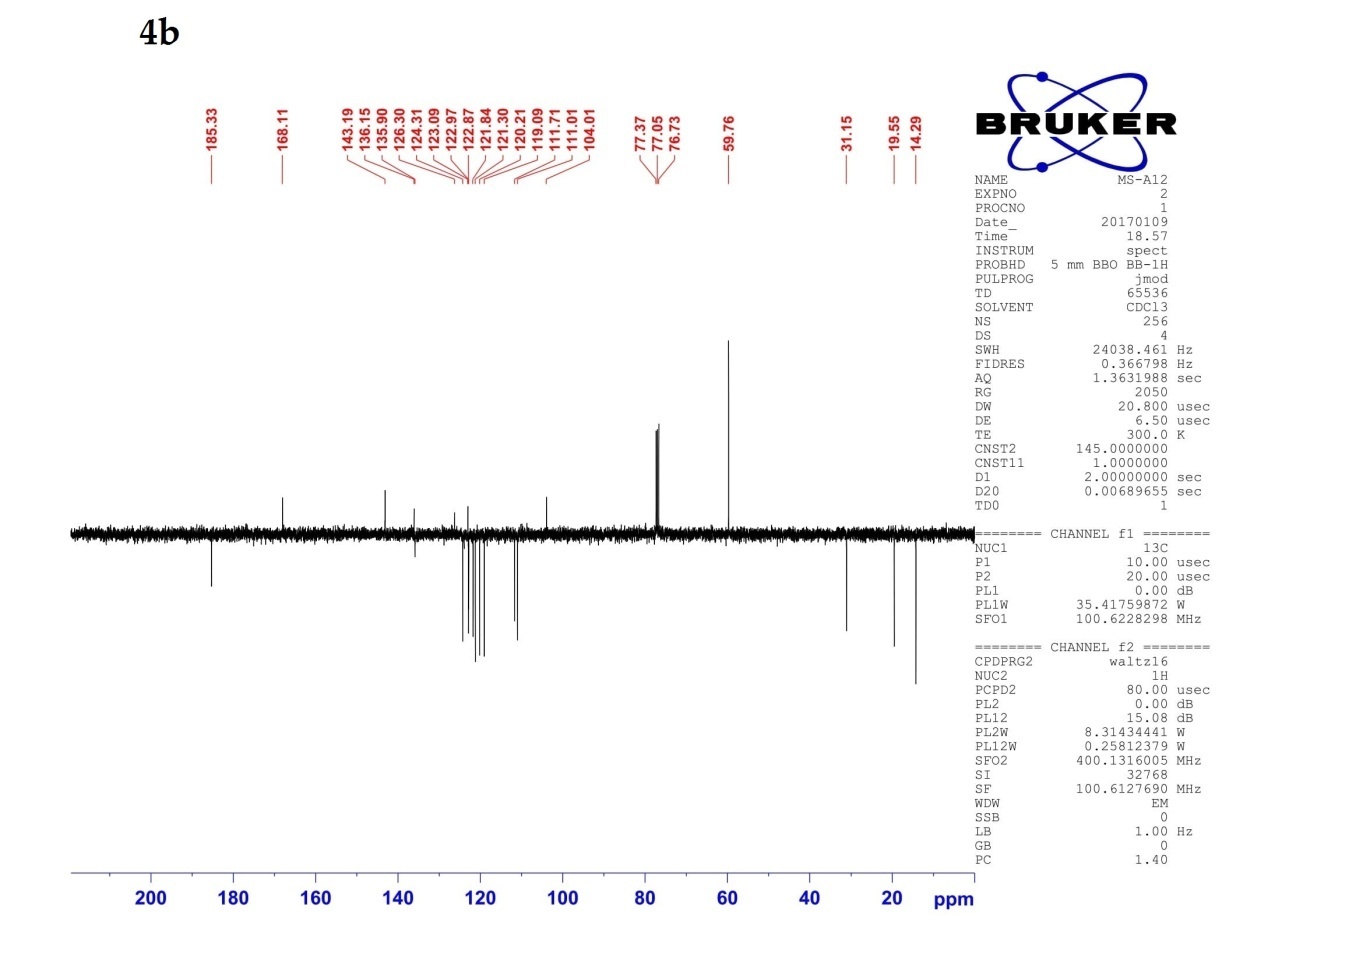


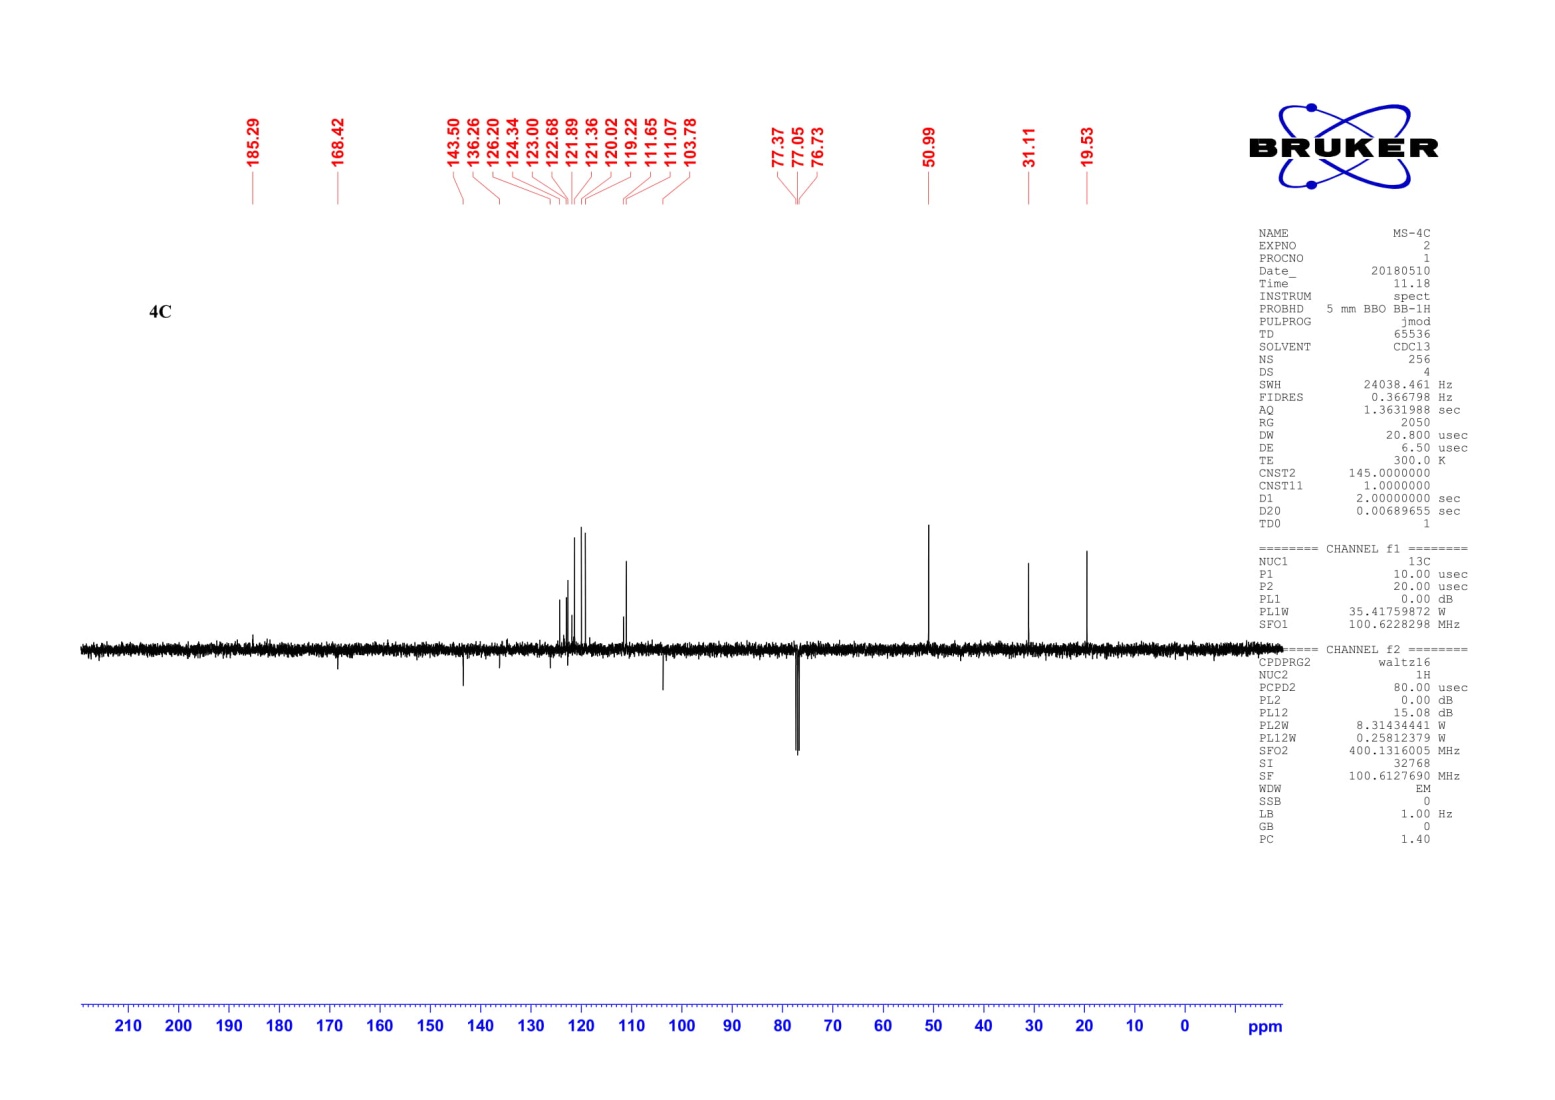


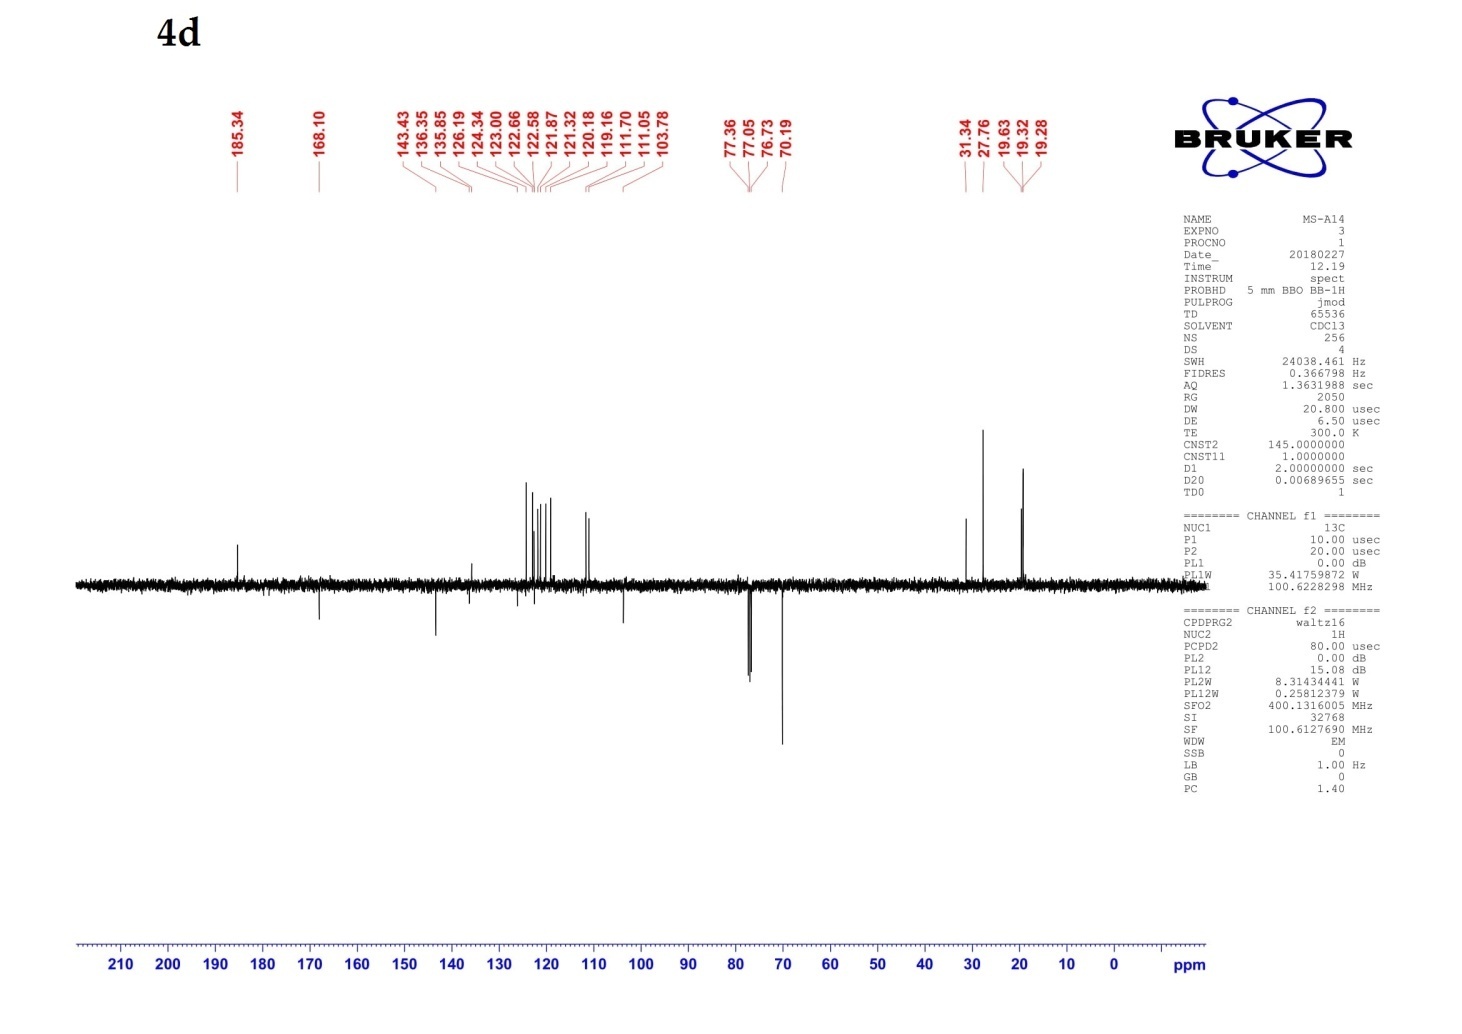


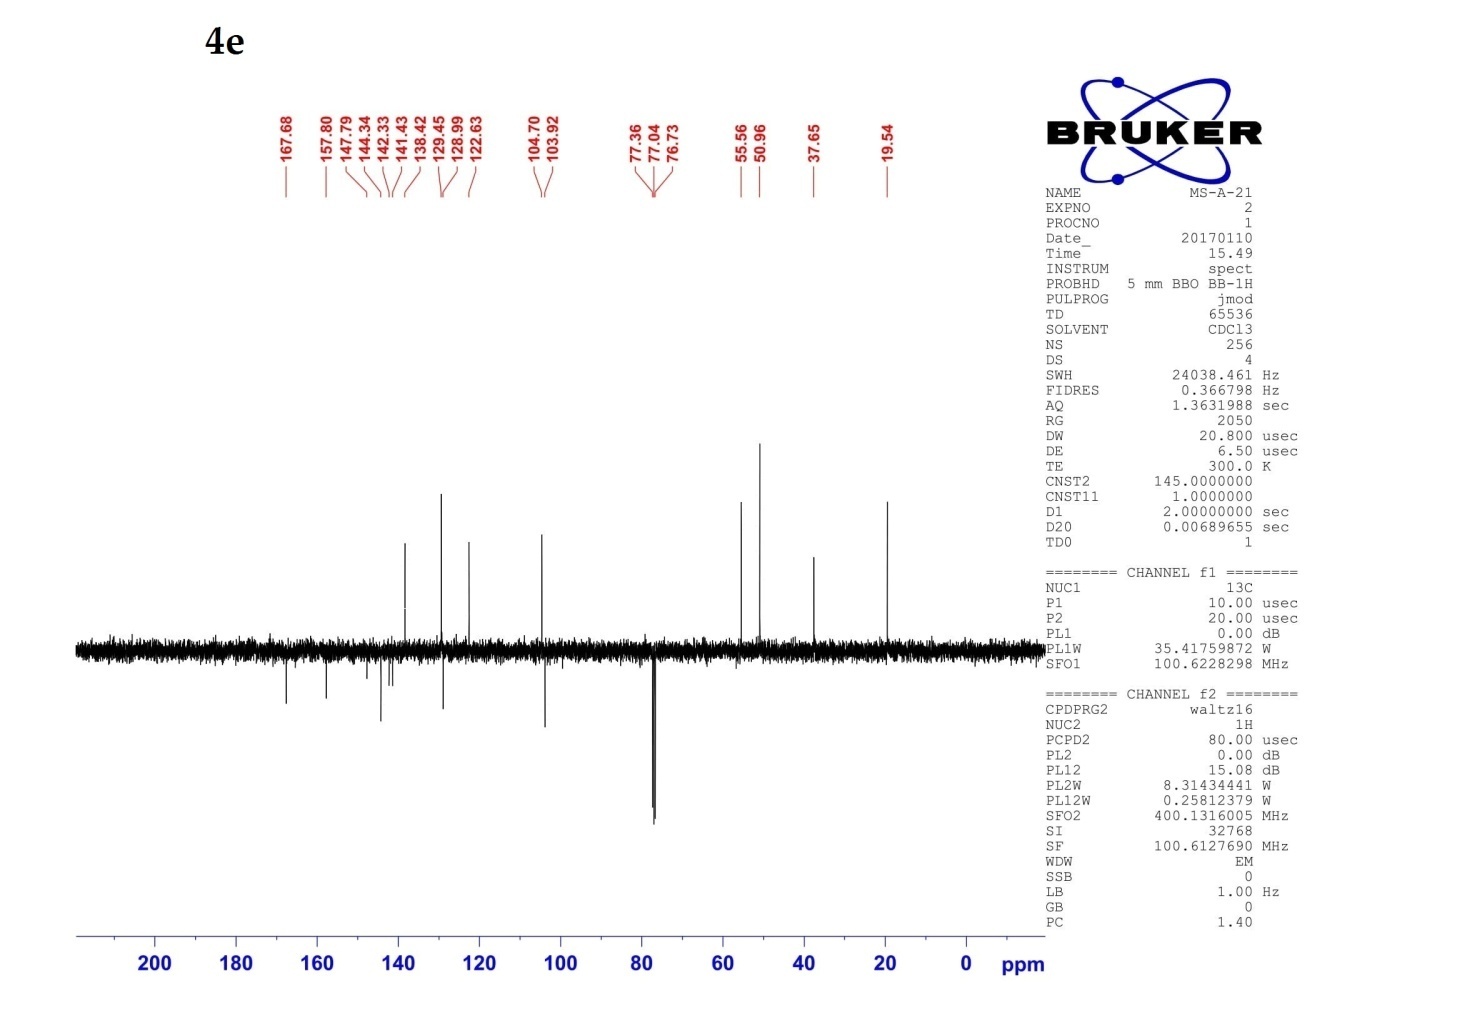


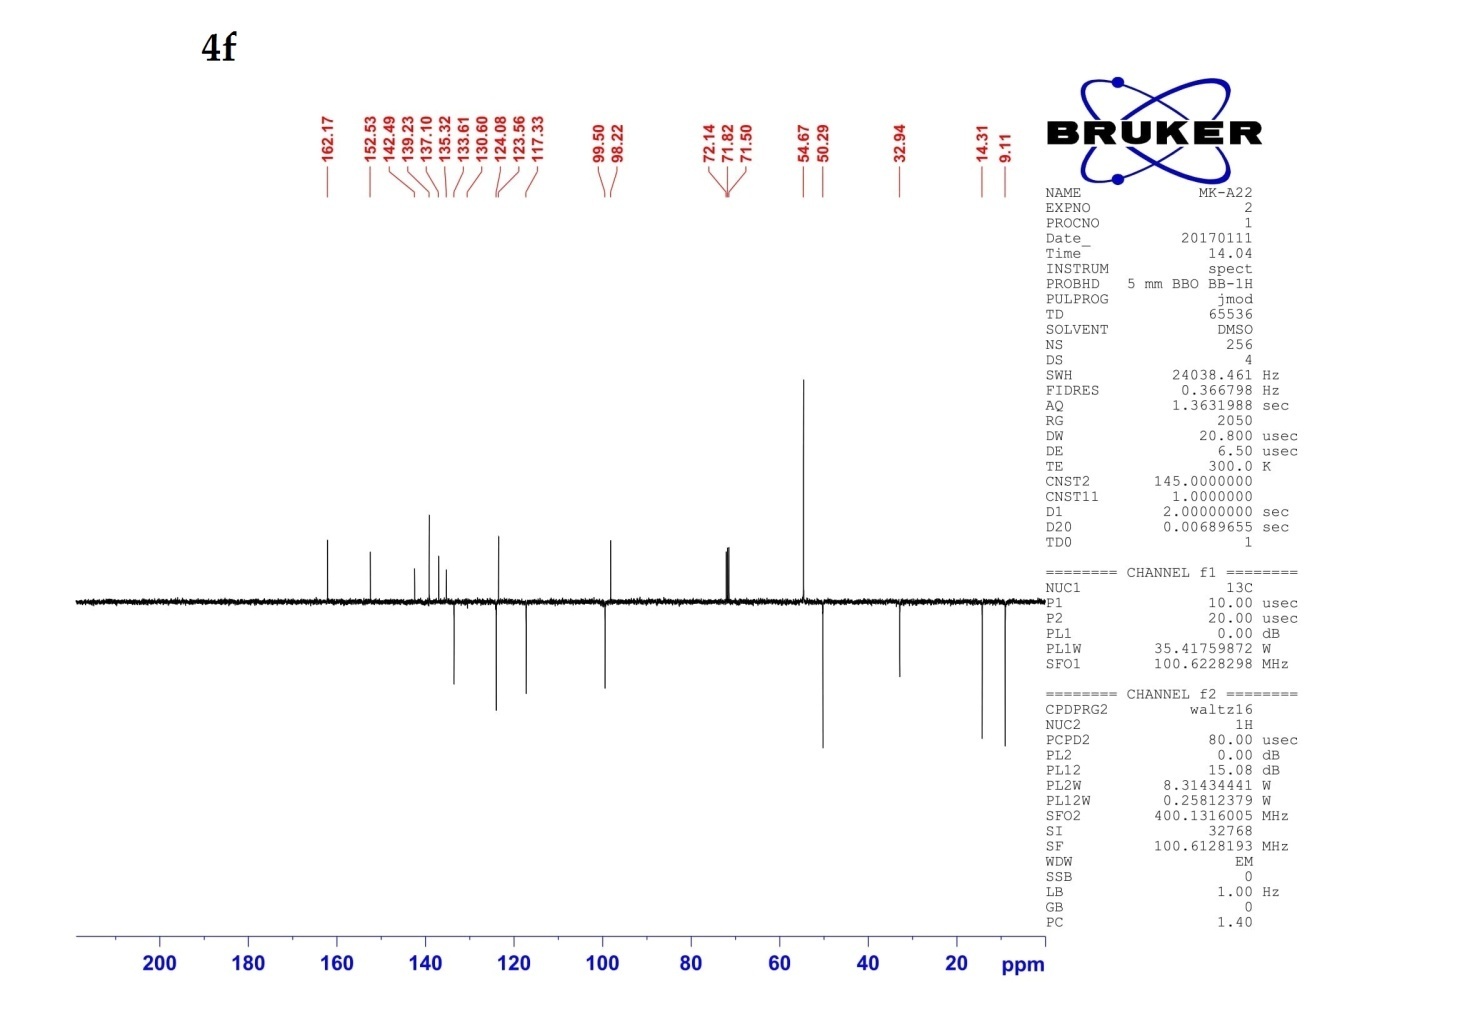


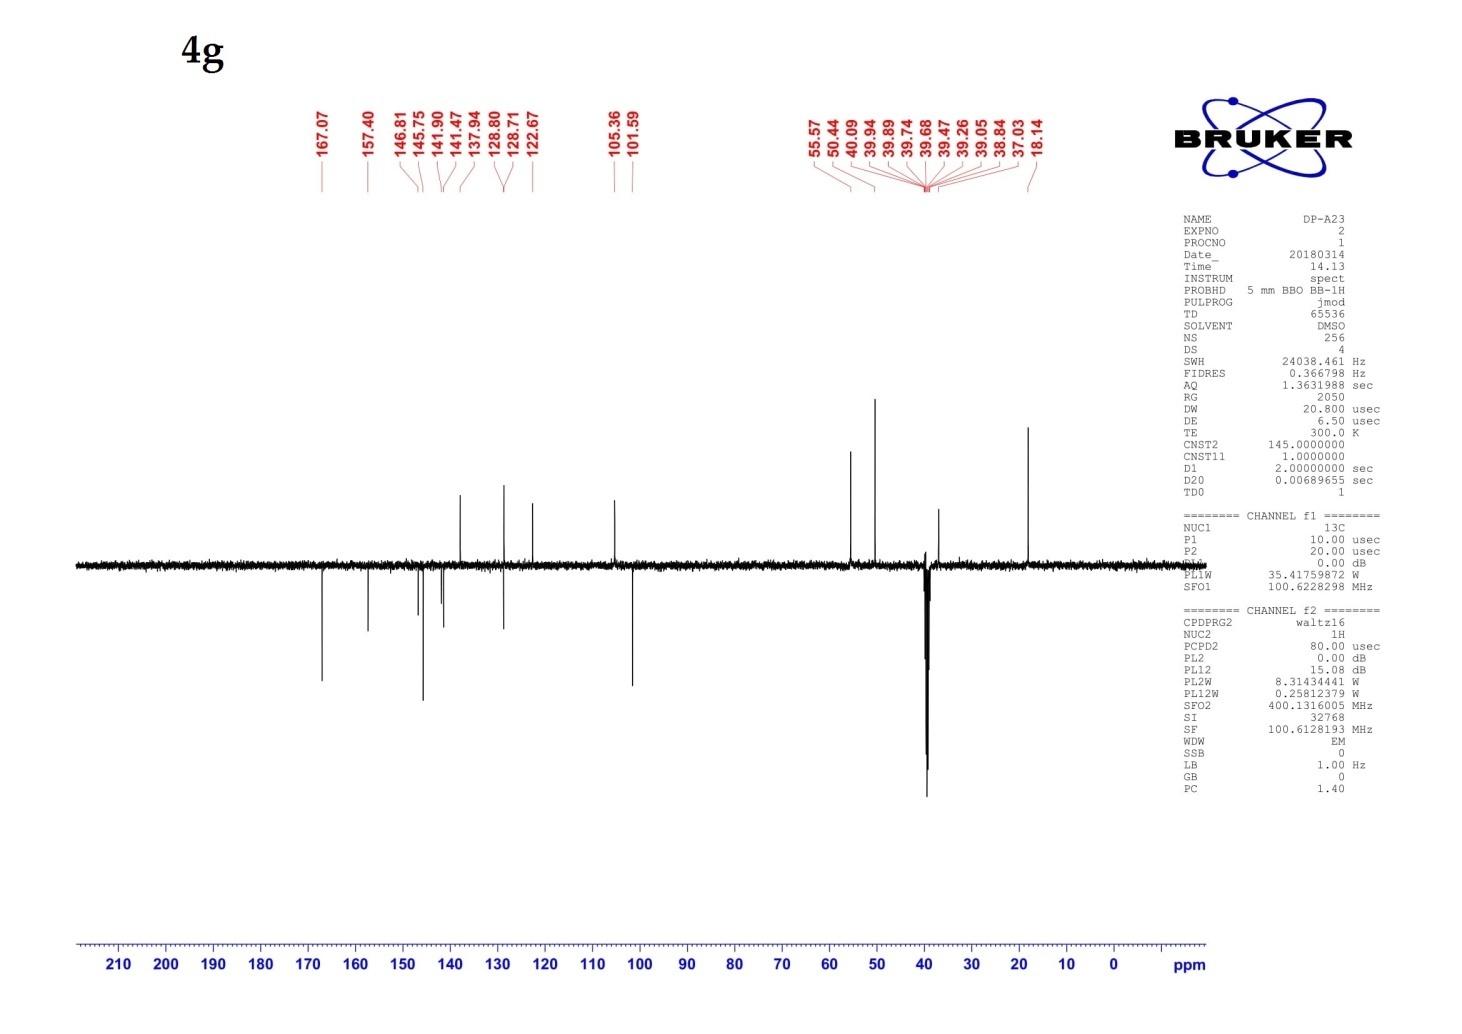


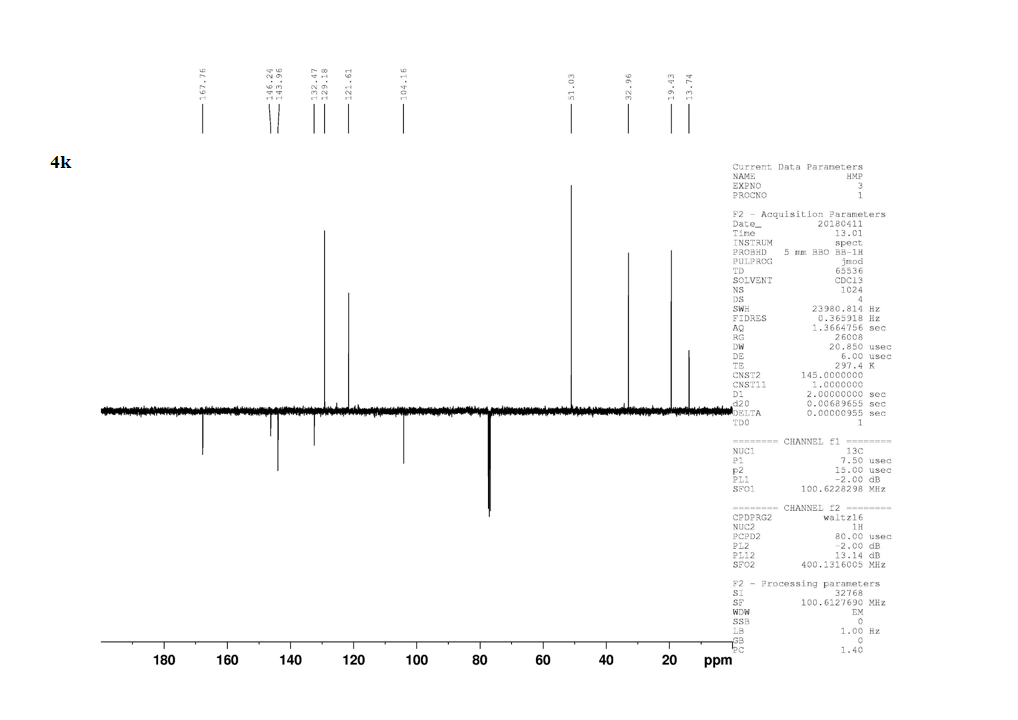


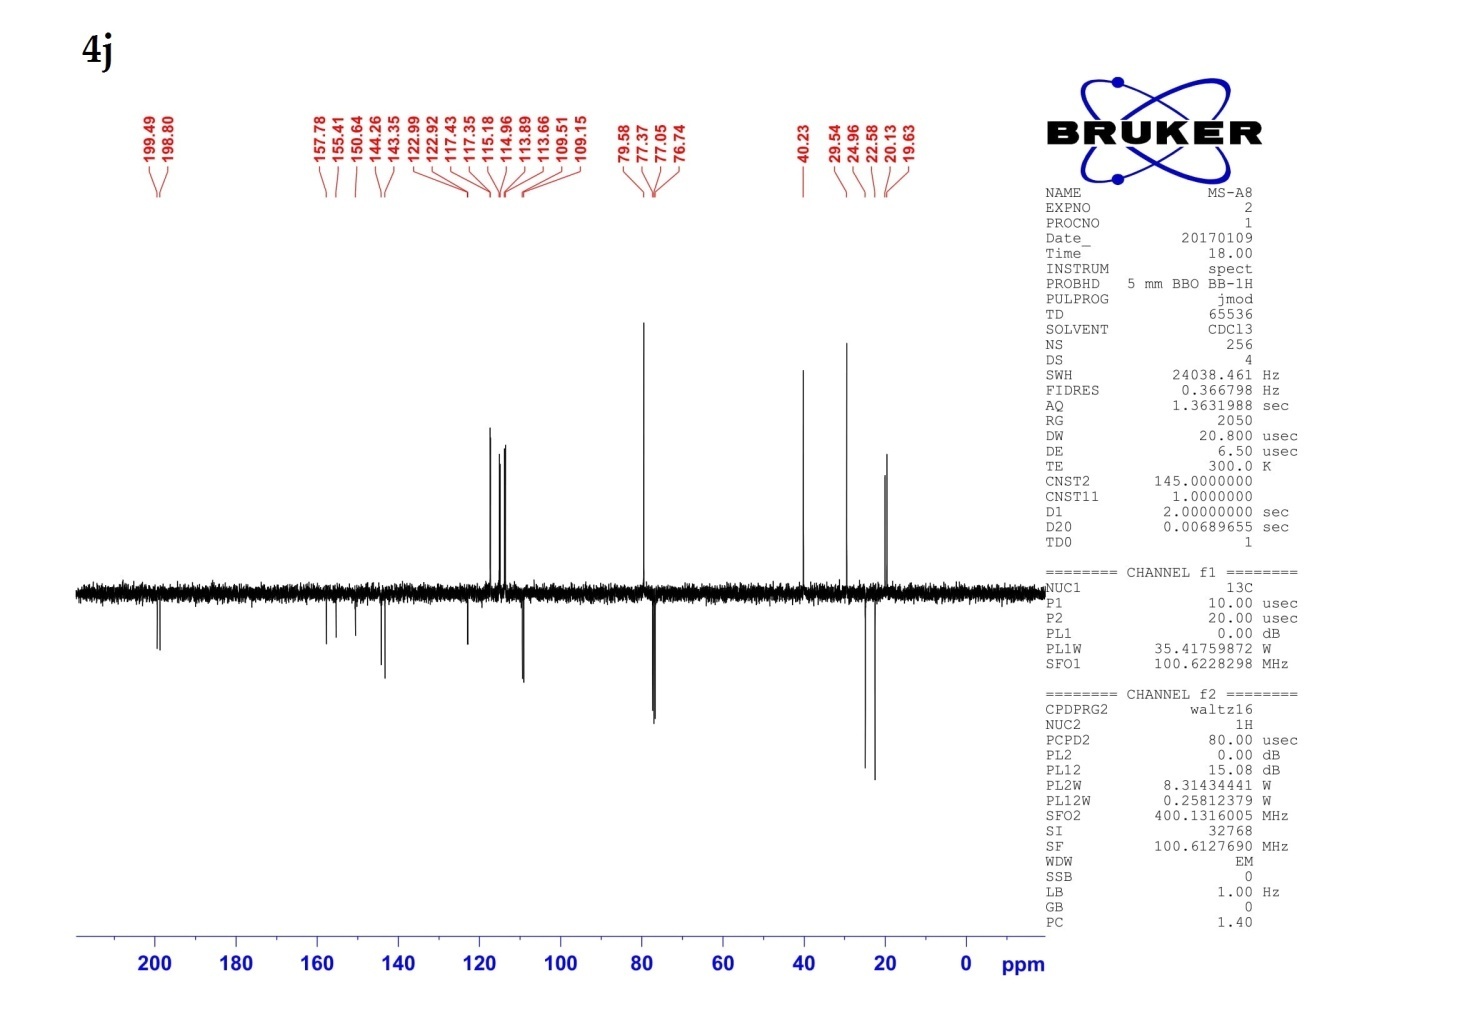


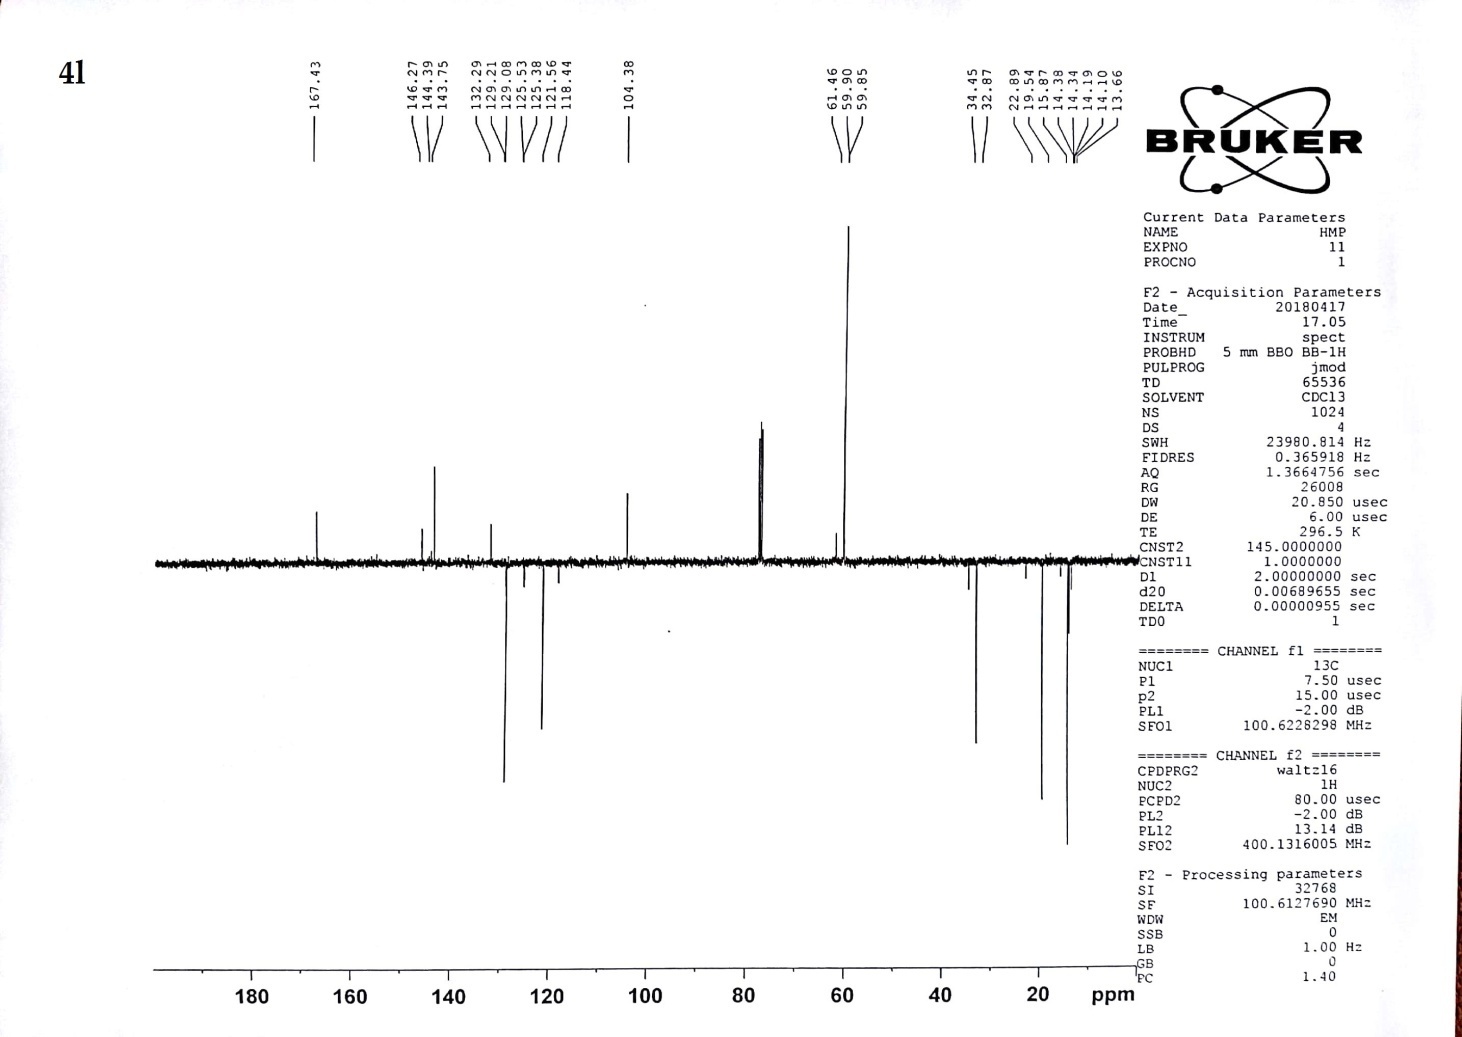


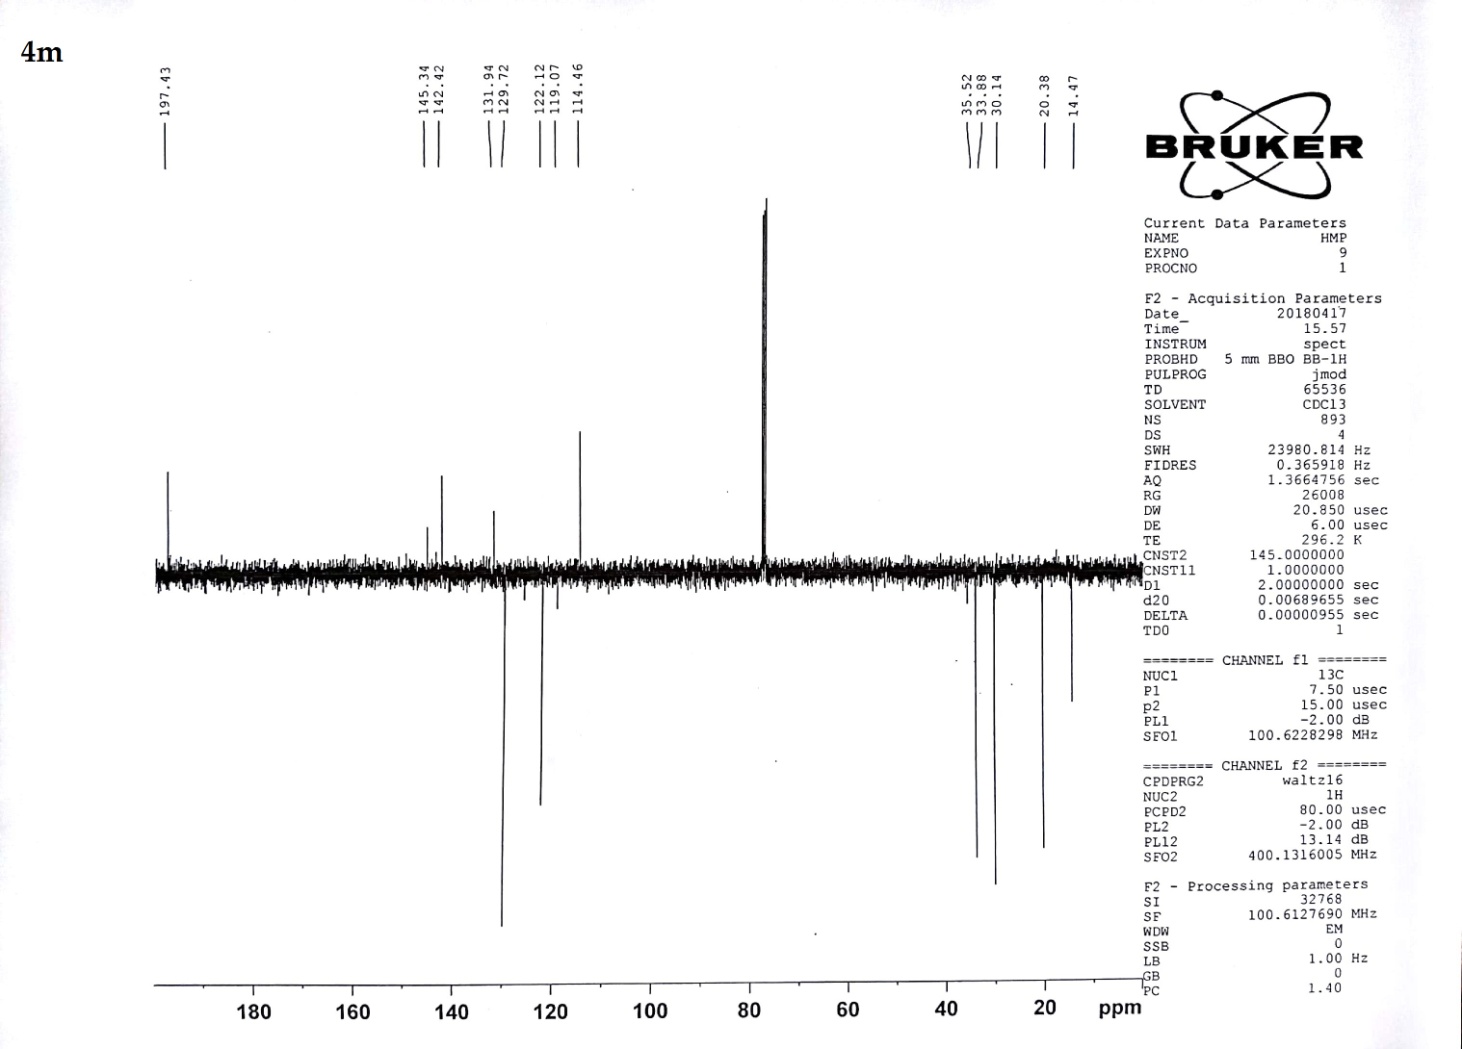


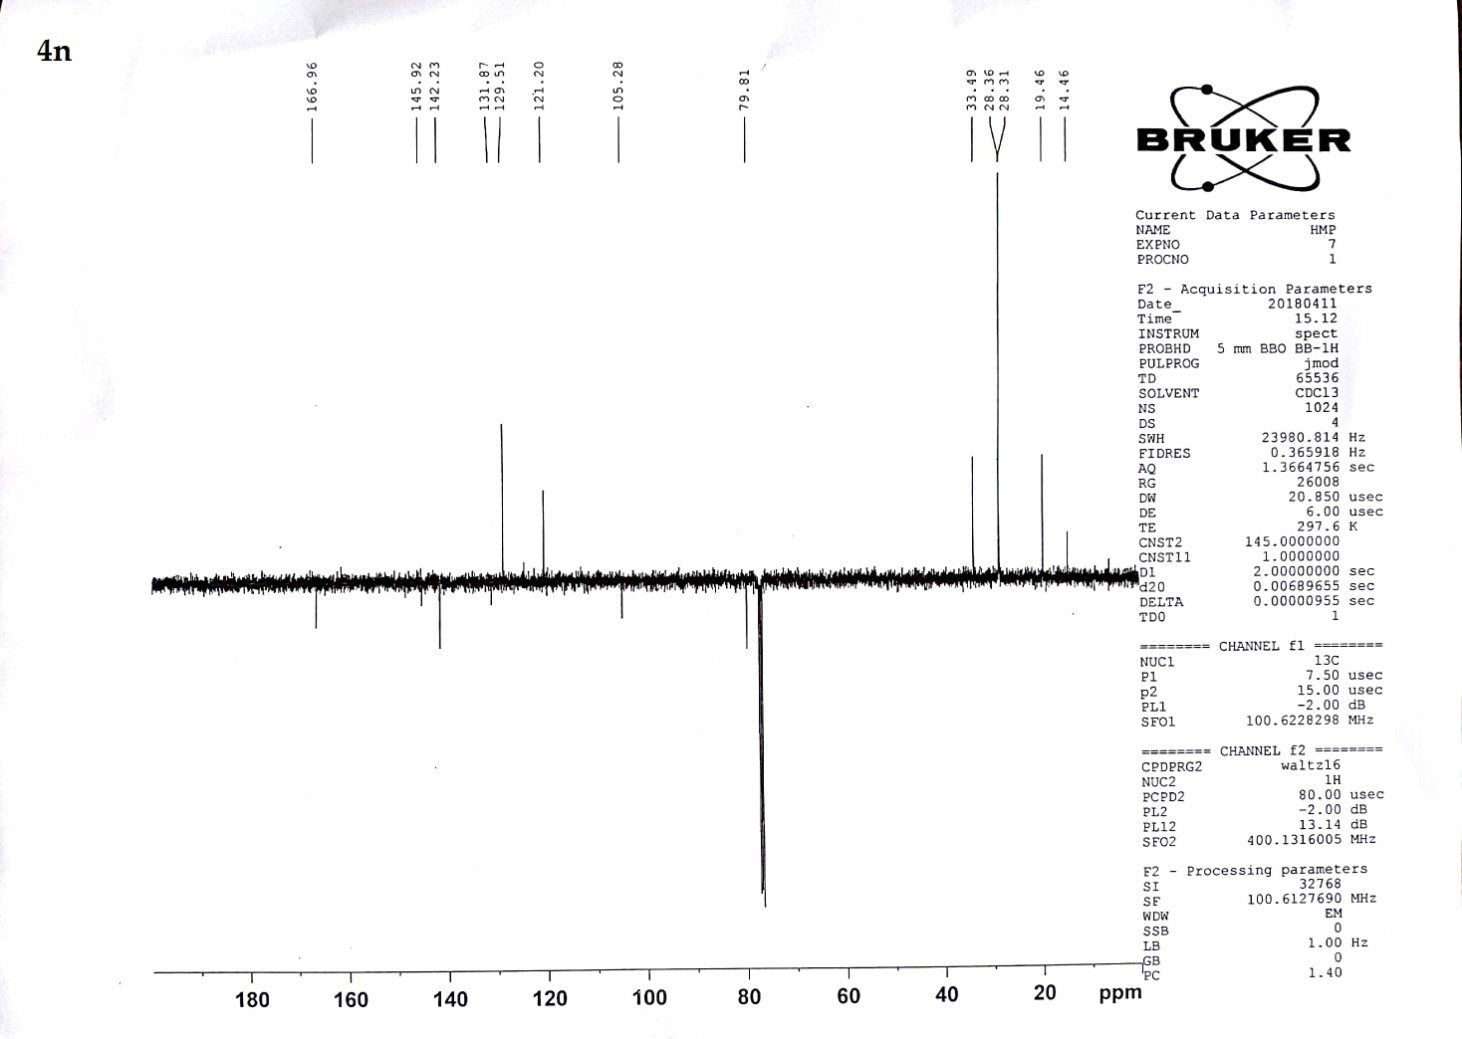


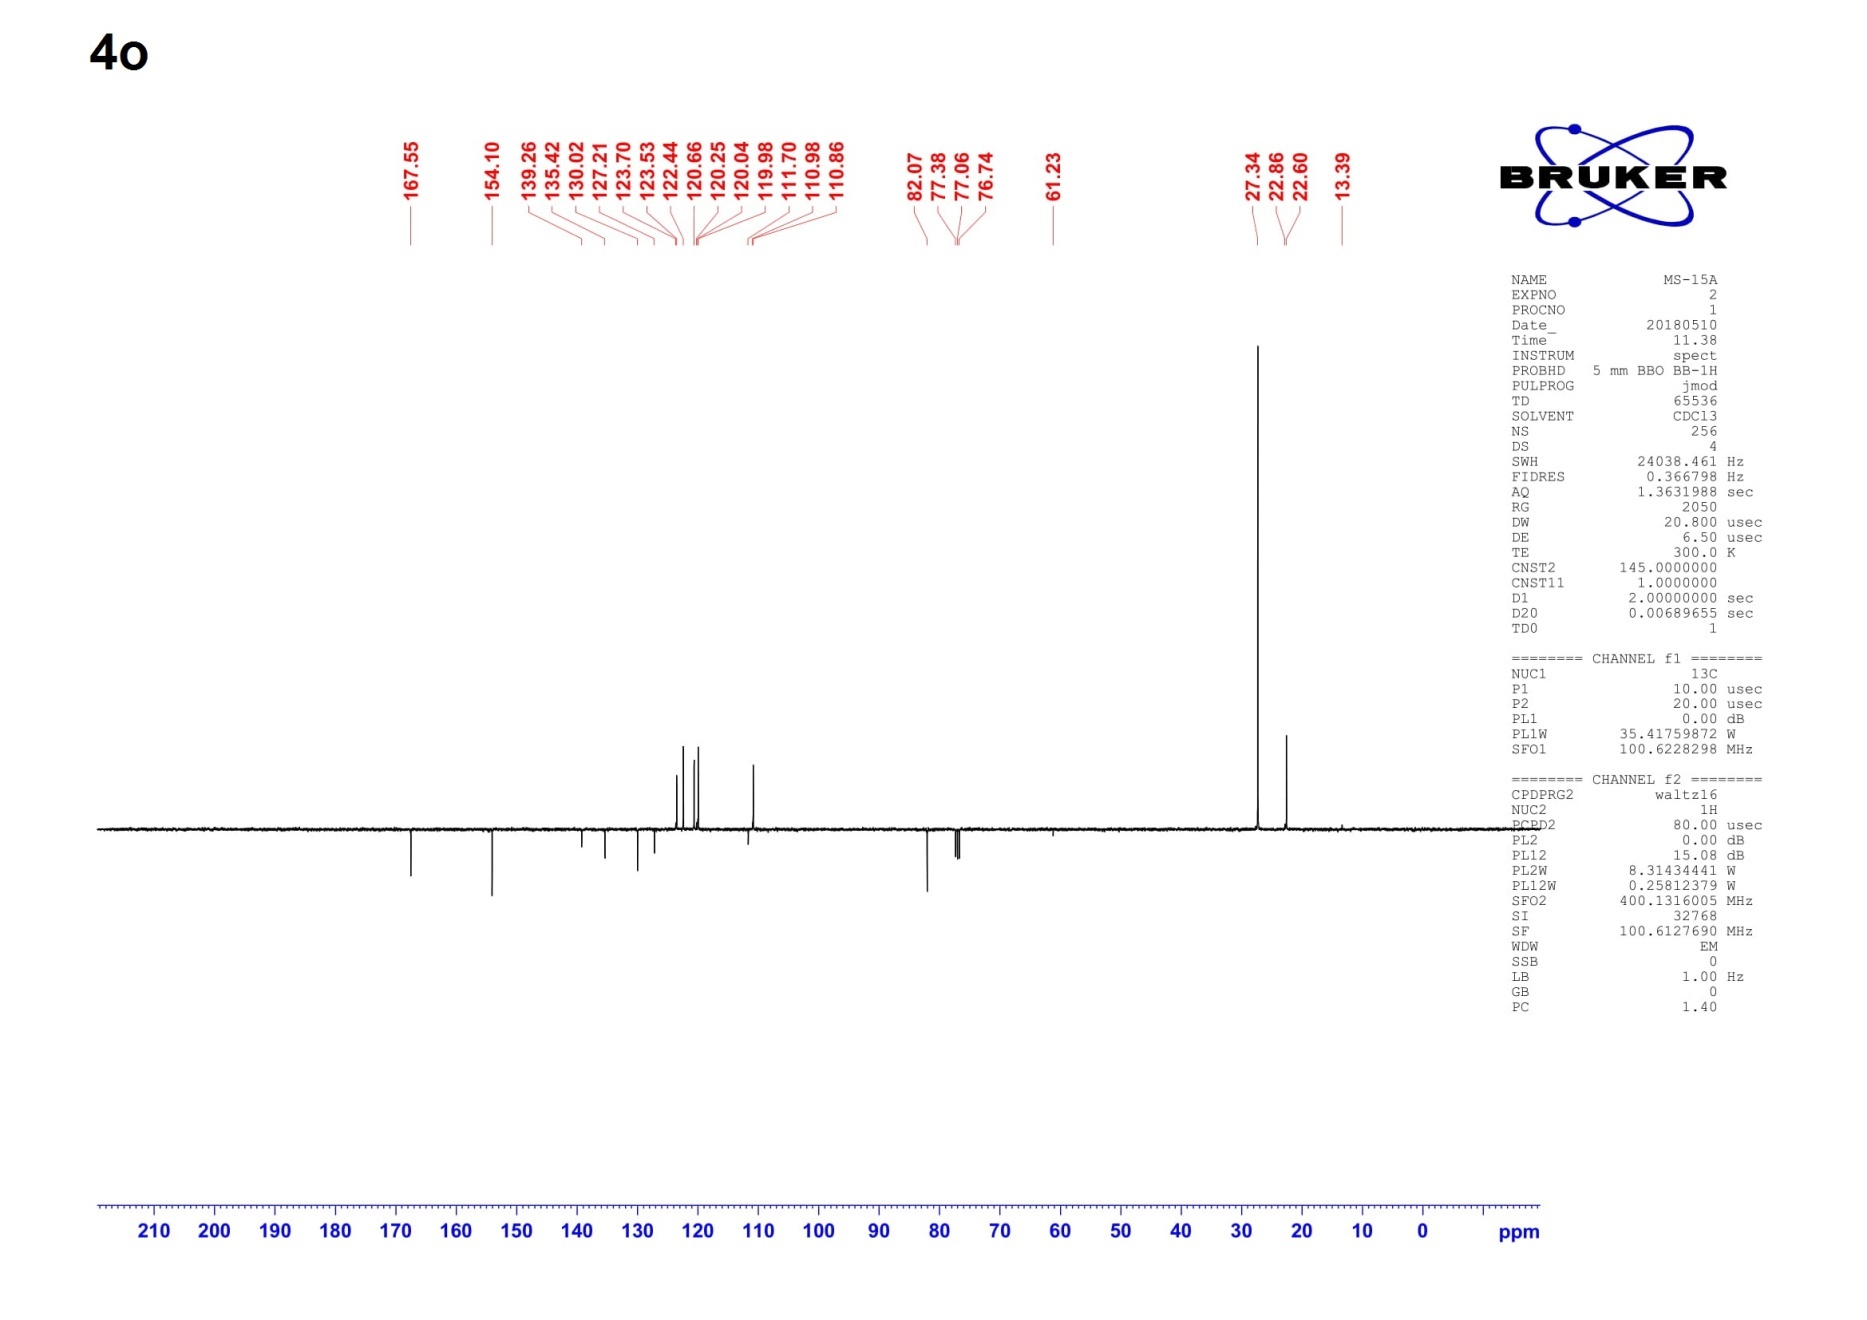


**3.ATR-FTIR spectra of Synthesized Compounds C and 4(a-k):**


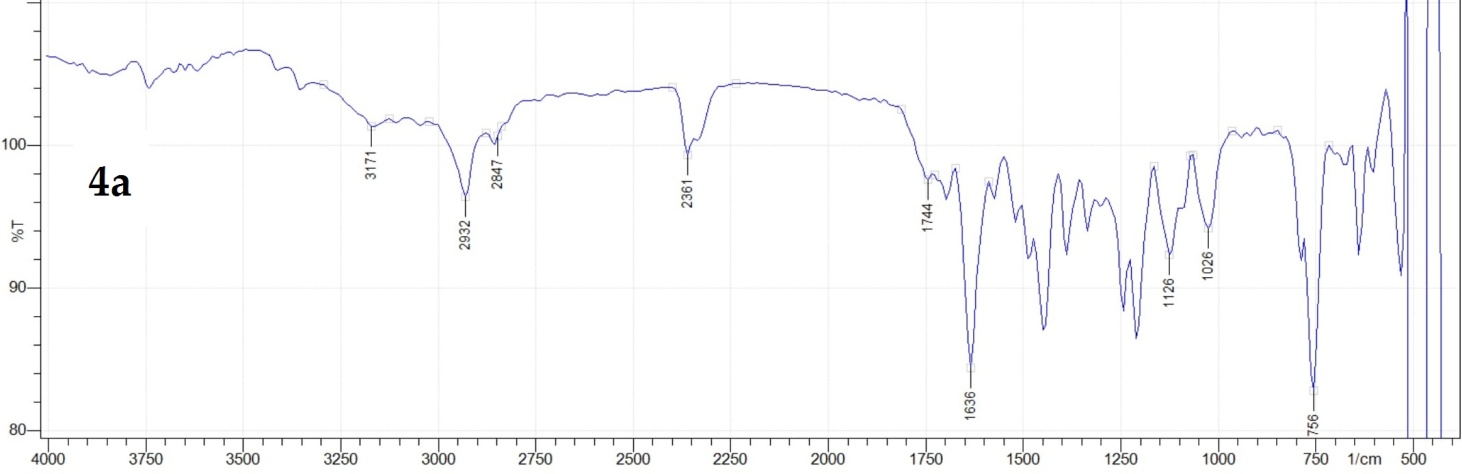


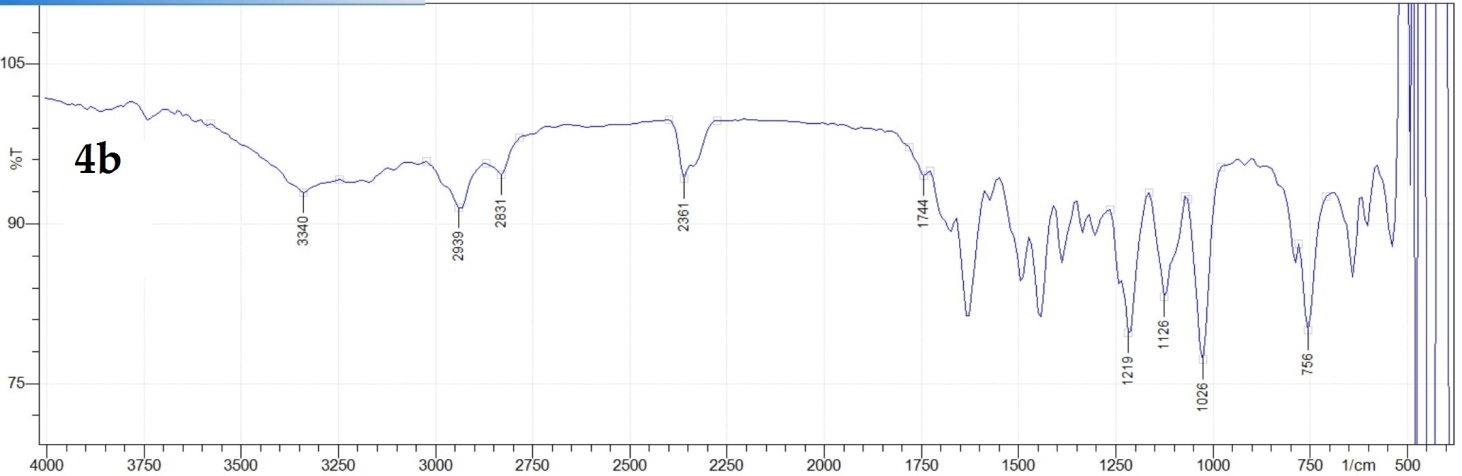


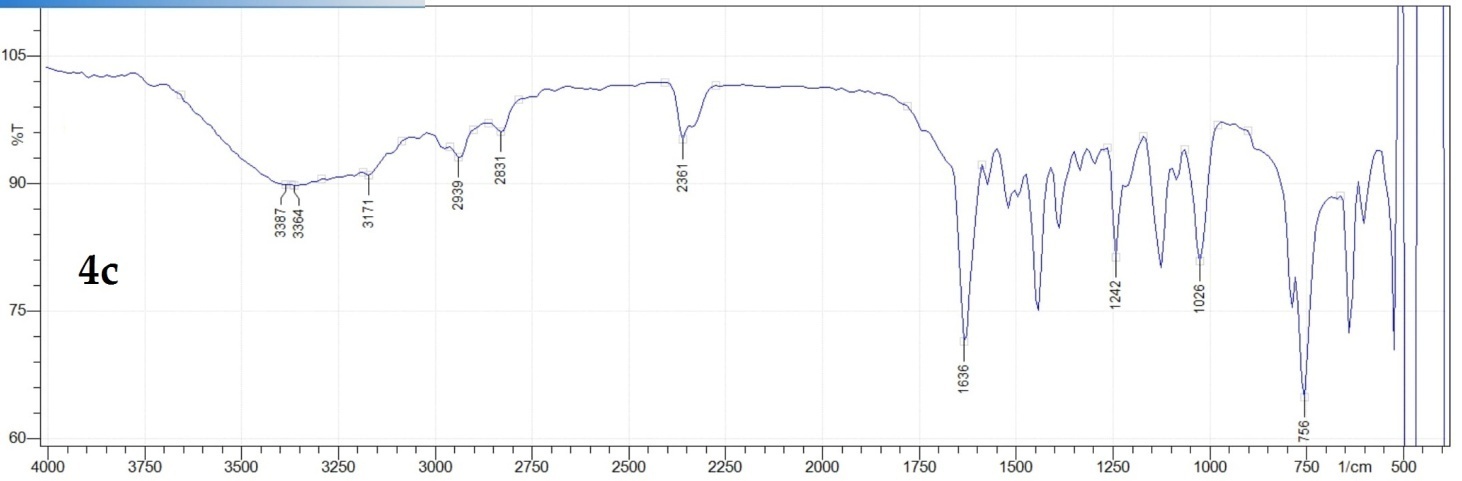


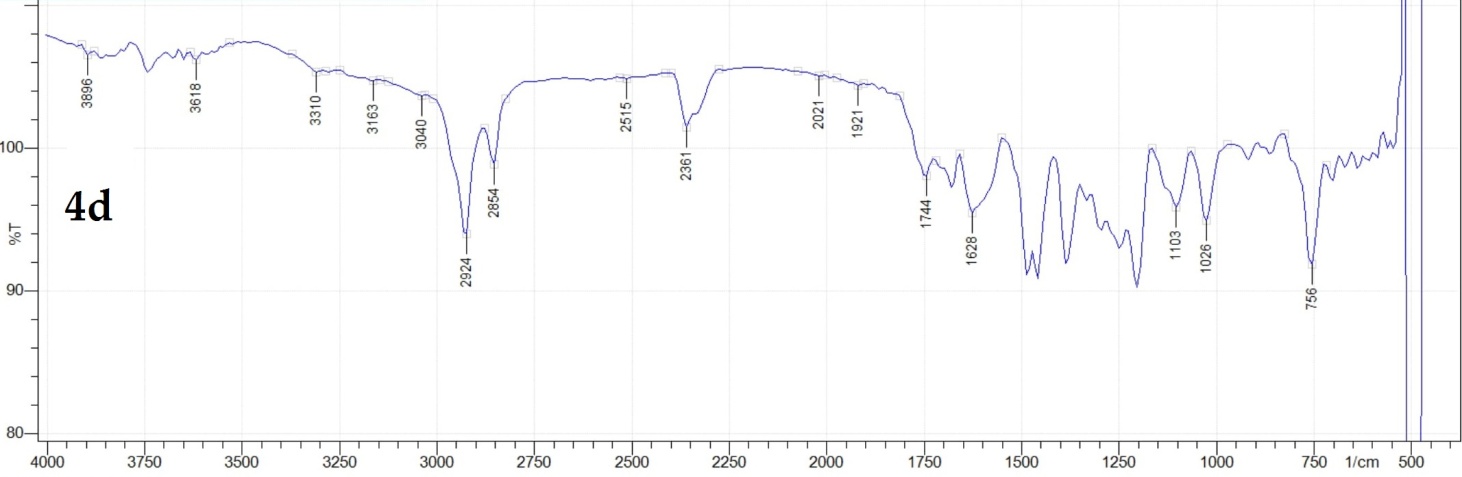


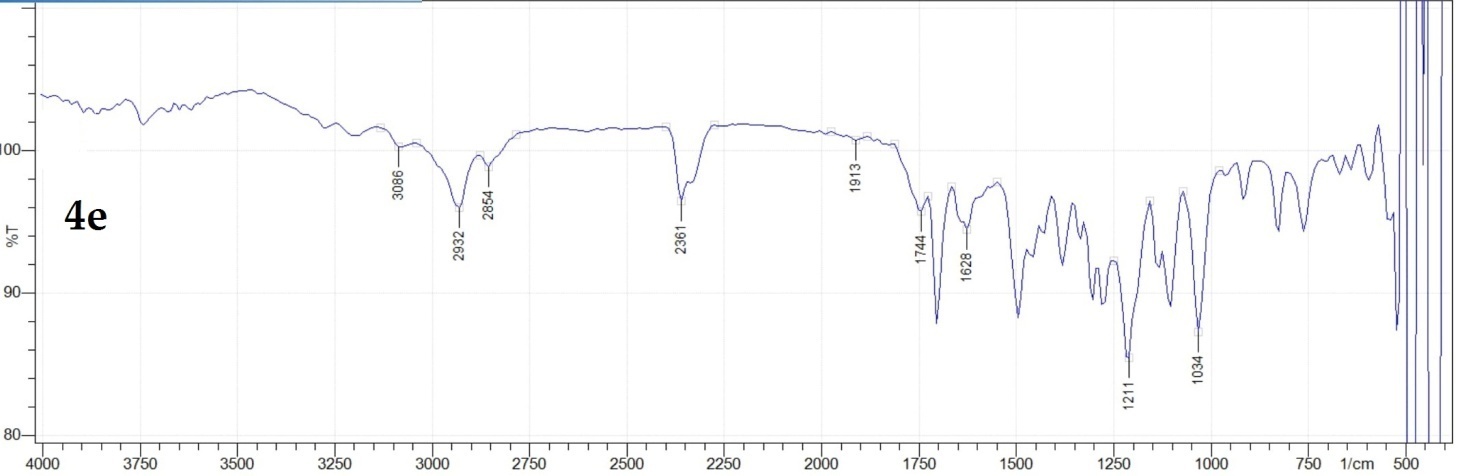


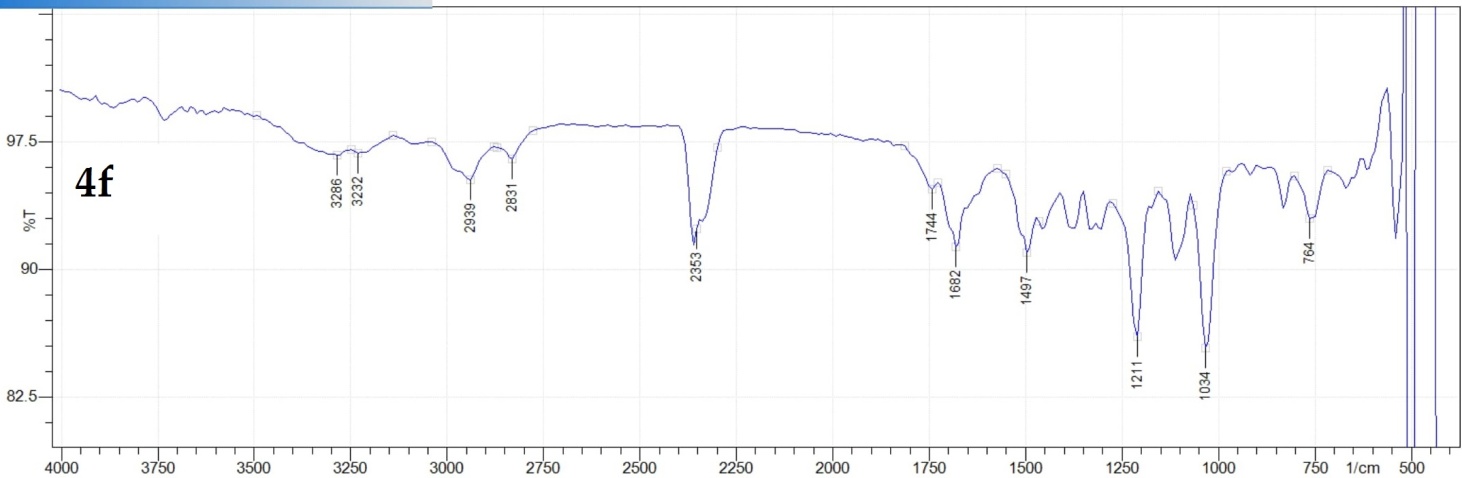


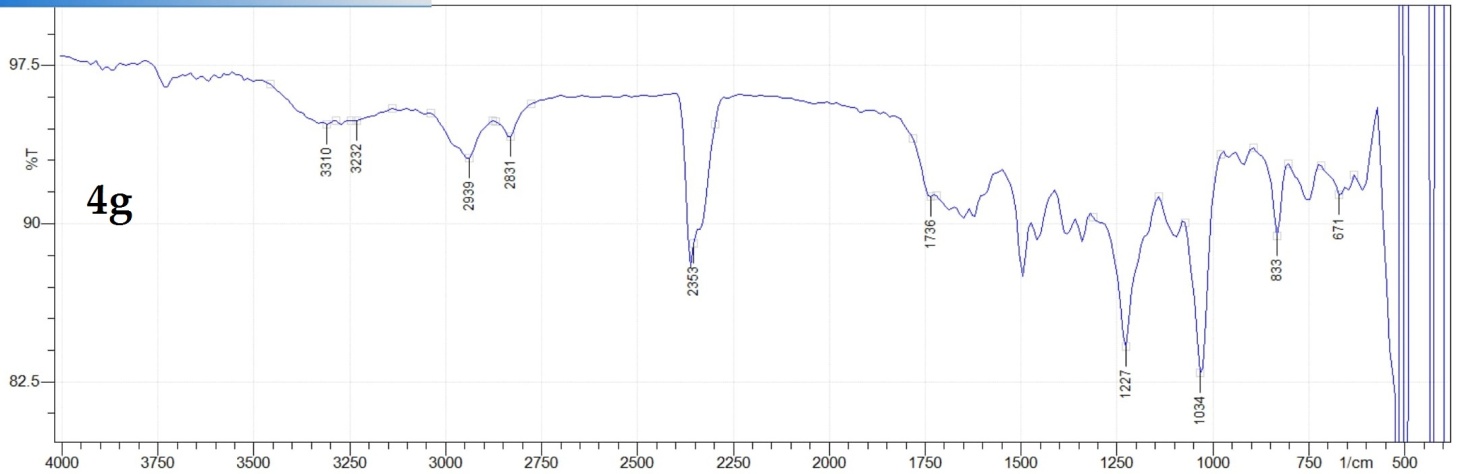


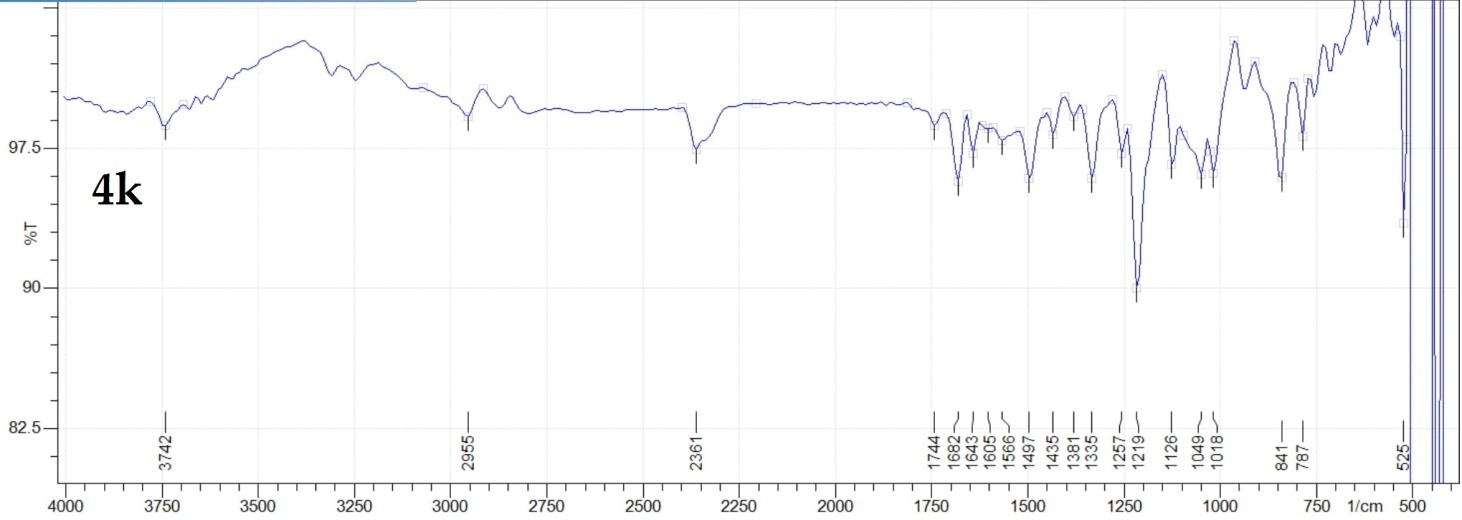


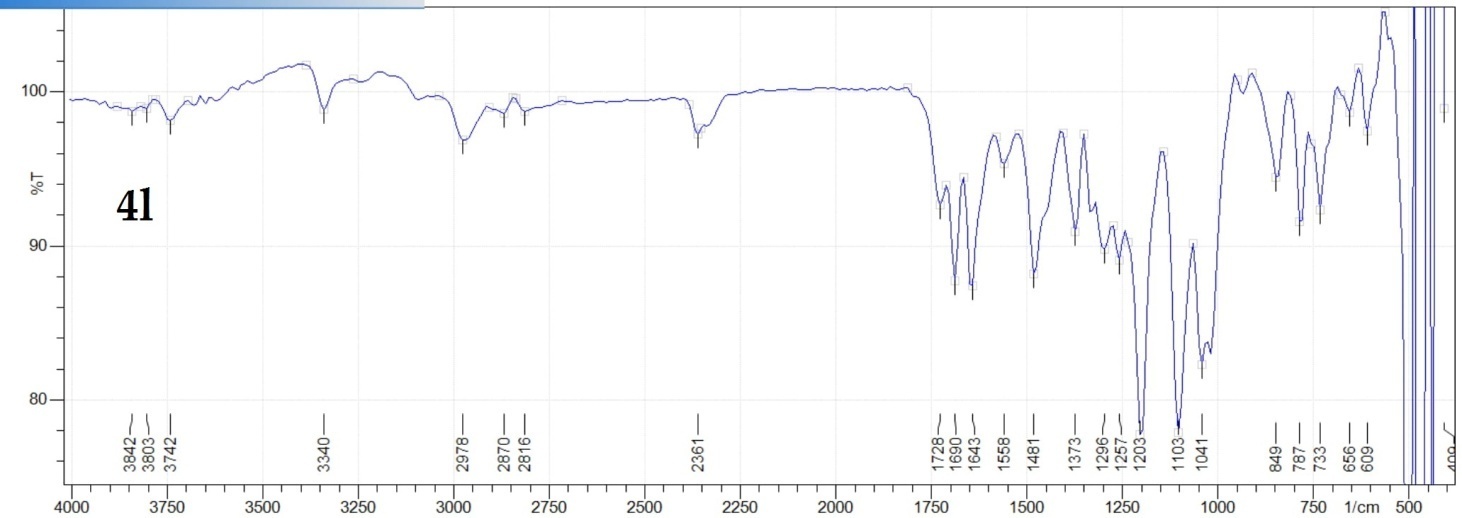


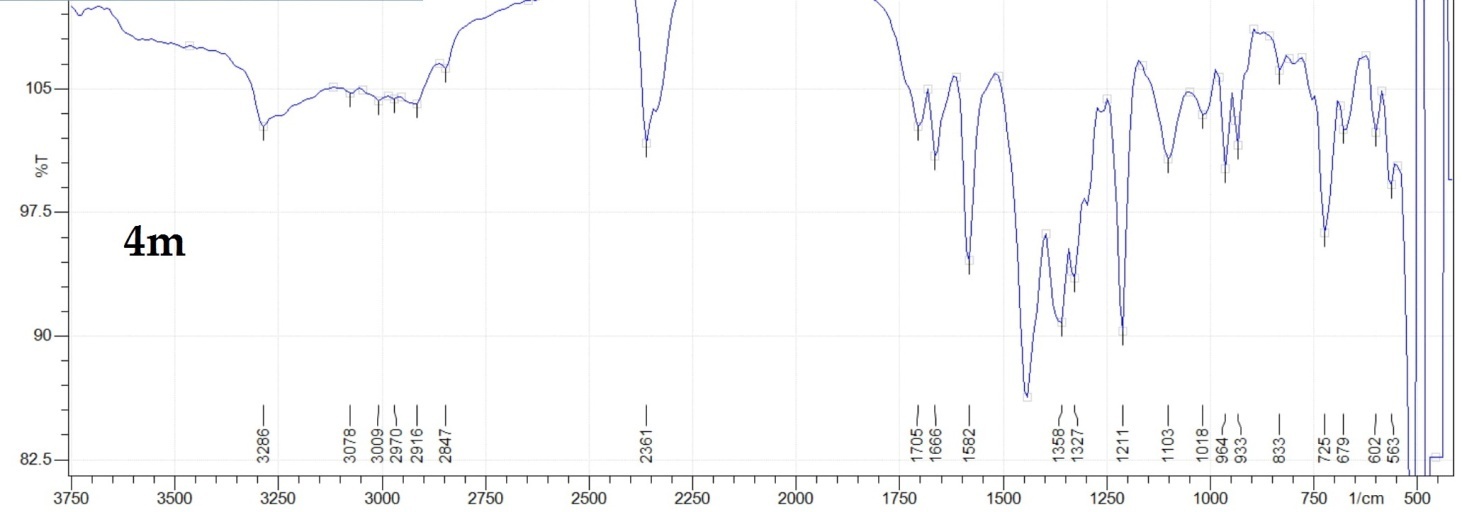


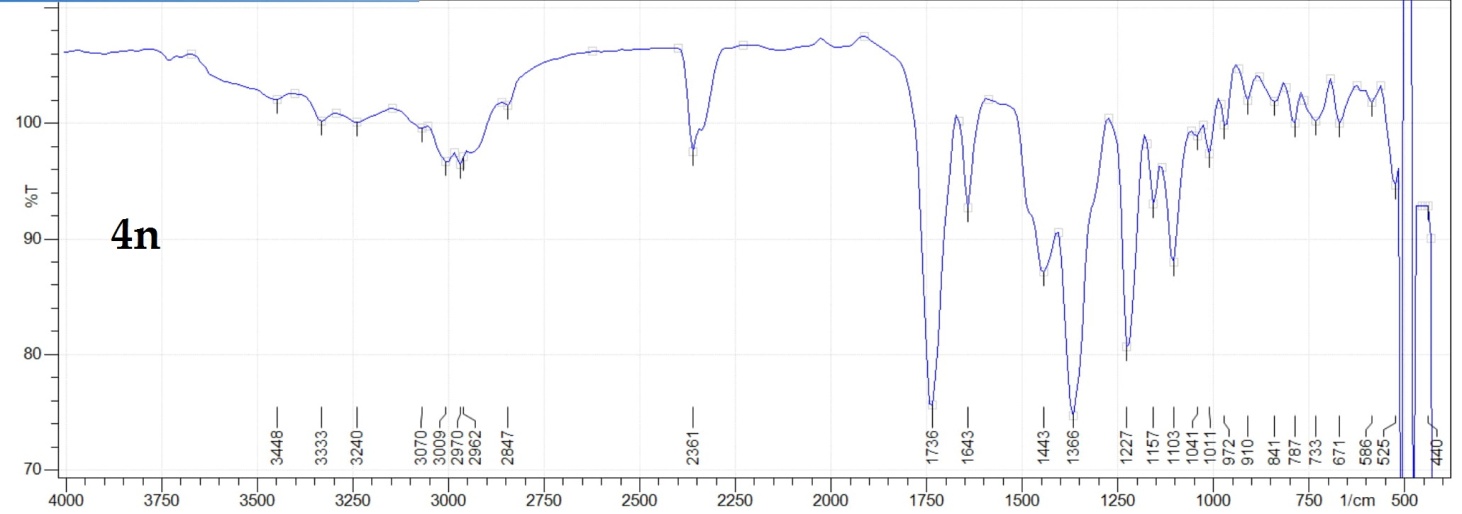


**4. Mass Spectra**

**Compound 4a**

**Compound 4b**

**Compound 4c**

**
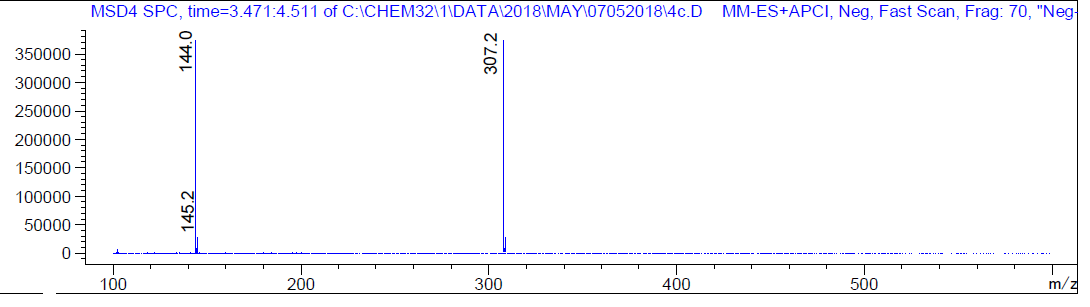
**

**Compound 4d**

**Compound 4e**

**Compound 4f**

**Compound 4k**

**Compound 4l**

**Compound 4m**

**Compound 4n**

**5. Single Crystal Study for compounds 4j, 4k, 4l, 4f and 4o.**

**Table:** experimental data.

| Details | **4j** | **4k** | **4l** | **4f** | **4o** |
| --- | --- | --- | --- | --- | --- |
| CCDC No | CCDC-1537138 | CCDC-1833114 | CCDC-1833113 | CCDC-1842607 | CCDC-1842606 |
| Crystal description | White block | White block | White block | clear light yellow Square | clear light yellow Block |
| Crystal size | 0.3 X 0.2 X 0.2 mm | 0.30 x 0.20 x 0.20 mm | 0.30 x 0.20 x 0.20 mm | 0.120 x 0.260 x 0.350 mm | 0.100 x 0.220 x 0.250 mm |
| Empirical formula | C20 H22FNO3 | C16 H19 N O4 S | C18 H23 N O4 S | C23H25ClN2O5 | C25H30N2O4 |
| Formula weight | 343.39 | 321.38 | 349.43 | 444.91 | 422.52 |
| Radiation, Wavelength | Mo *K*α, 0.71073 Å | Mo *K*α, 0.71073 Å | Mo *K*α, 0.71073 Å | Mo *K*α, 0.71073 Å | Mo *K*α, 0.71073 Å |
| Unit cell dimensions | a = 7.4986(13),  b= 17.128(2),  c= 13.984(2) Å | a =10.5436(10), b=10.7417(7),  c= 14.6404(11) Å | a =26.626(2), b=7.6044(5),  c= 18.0010(11) Å | a = 14.365(5) Å  b = 16.042(6) Å  c = 19.565(6) Å | a = 9.4206(4) Å  b = 13.4977(6) Å  c = 20.4459(9) Å |
| Crystal system | Monoclinic | Monoclinic | Monoclinic | Orthorhombic | Triclinic |
| Space group | P 21/c | P 21/c | C 2/c | P b c a | P -1 |
| Unit cell volume | 1735.1(5) | 1645.0(2) 3633.7(4) | 1645.0(2) 3633.7(4) | 4509.(3) Å3 | 2434.47(19) Å3 |
| No. of molecules per unit cell, Z | 4 | 4 | 8 | 8 | 2 |
| Temperature | 293(2) K | 293(2) K | 293(2) K | 296(2) K | 296(2) K |
| Absorption coefficient | 0.095 mm-1 | 0.213mm-1 | 0.199 mm-1 | 0.206 mm-1 | 0.078 mm-1 |
| F(000) | 728 | 680 1488 | 680 1488 | 1872 | 904 |
| Scan mode | ω scan | ω scan | ω scan | Multi-scan | Multi-scan |
| θ range for entire data collection | 3.68 <θ< 25.00o | 3.73 <θ< 26.00o | 3.53<θ< 25.00o | 2.08 to 19.85° | 1.01 to 24.06° |
| Range of indices | h = -5 to 8, k = -10 to 20, l = -16 to 16 | h = -13 to 7, k = -9 to 13, l = -17 to 18 | h = -26 to 31, k = -5 to 9, l = -21 to 12 | -13<=h<=13, -12<=k<=15, -15<=l<=18 | -10<=h<=10, -15<=k<=15, -23<=l<=23 |
| Reflections collected / unique | 4292 / 2660 | 6412 / 3200 | 6325 / 3180 | 7629/1453 | 29086/ 3882 |
| Reflections observed (I > 2(I)) | 1820 | 2115 | 2155 | 2044 | 7617 |
| Structure determination | Direct methods | Direct methods | Direct methods | Direct methods | Direct methods |
| Refinement | Full-matrix  least-squares on F2 | Full-matrix  least-squares on F2 | Full-matrix  least-squares on F2 | Full-matrix  least-squares on F2 | Full-matrix  least-squares on F2 |
| No. of parameters refined | 244 | 208 | 246 | 291 | 584 |
| Final R | 0.0791 | 0.0602 | 0.0643 | 0.1510 | 0.0615 |
| wR(F2) | 0.1938 | 0.1547 | 0.1780 | 0.3015 | 0.1408 |
| Goodness-of-fit | 1.055 | 1.012 1.052 | 1.012 1.052 | 1.168 | | 1.013 | | | --- | --- | |  |  | |
| Final residual electron density | -0.414 < < 0.490 eÅ-3 | -0.341 < < 0.330eÅ-3 | -0.451 < < 0.508 eÅ-3 | -0.373 < < 0.390 eÅ-3 | -0.205 < < 0.277 eÅ-3 |
| Measurement | *X’calibur system-Oxford diffraction make, U.K* | *X’calibur system-Oxford diffraction make, U.K* | *X’calibur system-Oxford diffraction make, U.K* | *X’calibur system-Oxford diffraction make, U.K* | *X’calibur system-Oxford diffraction make, U.K* |
| Software for structure solution: | SHELXS97 (Sheldrick, 2008) | SHELXS97 (Sheldrick, 2008) | SHELXS97 (Sheldrick, 2008) | SHELXL-2014/7 (Sheldrick, 2014) | SHELXL-2014/7 (Sheldrick, 2014) |
| Software for refinement: | SHELXL97 (Sheldrick, 2008) | SHELXL97 (Sheldrick, 2008) | SHELXL97 (Sheldrick, 2008) | SHELXL-2014/7 (Sheldrick, 2014) | SHELXL-2014/7 (Sheldrick, 2014) |
| Software for molecular plotting: | ORTEP-3 (Farrugia, 1997) PLATON | ORTEP-3 (Farrugia, 1997) PLATON | ORTEP-3 (Farrugia, 1997) PLATON | ORTEP-3 (Farrugia, 1997) PLATON | ORTEP-3 (Farrugia, 1997) PLATON |
| Software for geometrical calculation | PLATON (Spek,2009) PARST (Nardelli, 1995) | PLATON (Spek, 2009)  PARST (Nardelli, 1995) | PLATON (Spek, 2009)  PARST (Nardelli, 1995) | PLATON (Spek, 2009)  PARST (Nardelli, 1995) | PLATON (Spek, 2009)  PARST (Nardelli, 1995) |

**5.1 Crystal image**

**
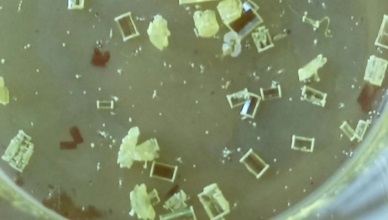

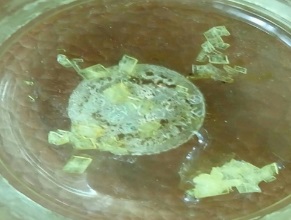

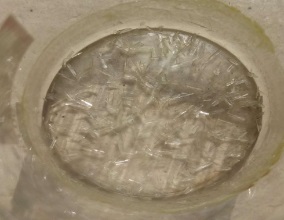

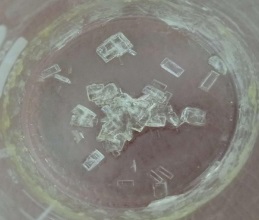

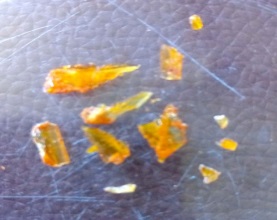
**

Compound **4f** Compound **4j**  Compound **4k**  Compound **4l** Compound **4o**

**6. EXPERIMENTAL SECTION**

**6.1 General Information**

All raw materials for this study were purchased from commercially available sources without further purification. The structure of all compounds was confirmed by 1H-NMR and 13C-APT spectra were recorded on Bruker Advance III (1H: 400 MHz) and (13C:100 MHz) respectively using CDCl3 or DMSO as a solvent. Splitting patterns were described as singlet(s), doublet (d), triplet (t), a quartet (q) and broad (br). The values of chemical shift (δ) were given in ppm and coupling constant (J) in Hertz (Hz). IR spectra were recorded on an ABB MB3000 spectrophotometer. LC-MS data were recorded on LCMS- agilent 6120 quardrupole. Elemental analysis was performed in a Perkin-Elmer 2400 Series-II elemental analyzers and the results were within ± 0.4 % of the theoretical values, unless otherwise noted. Melting points were uncorrected by open capillary method. The progress of reaction for compounds (**4a-o**) was monitored by silica gel 60 F254 (Merck) coated TLC plates. Reported Rf values correspond to elution with 3:2 (n-hexane: ethylacetate) mobile phase. All the compounds were separated and purified by Automated Flash Chromatography-AI 580S model of Yamazen with using n-hexane: ethylacetate (4:1) mobile phase.

**6.2 Experimental Procedures**

6.2.1 Synthesis of 1,4-DHPS **4(a-d) and 4o.**

*1H*-indole-3-carbaldehyde (IN-3C) (0.145g, 1mmol), ammonium acetate (0.077g, 1mmol), different 1,3-dione (0.1 - 0.25 g, 2mmol) and L-proline (10 %) as catalyst were added in 10 ml ethanol to 50ml Round bottom flask. The mixture was stirred well for 2-3 hours at 60 0C and cooled to room temperature. The progress of the reaction was monitored by TLC. The reaction mixture was poured into cold water to fall out the product. The product was purified from hot water wash and then treated with n-hexane, after drying the crude Brown/yellow product was recrystallized from ethanol along with charcoal treatment. The same reaction was also carried out at ambient temperature.

*Dimethyl-1,4-dihydro-4-(1H-indol-3-yl)-2,6-dimethyl pyridine-3,5-dicarboxylate* (**4a**): Prepared from Indole-3-carboxaldehyde (1mmol), methyl acetoacetate (2mmol) and ammonium acetate (1mmol), ethanol (10ml) and L-Proline {0.06 g, 0.1mmol (10%); produced in pure form; Yield: 77% (0.263g); light yellow solid; mp: 180-185 0C; Rf value: (n-hexane: ethyl acetate, 4:1) 0.56; 1H-NMR (CDCl3 , 400 MHZ); δ = 2.24 (s, 6H), 3.53 (s, 6H), 5.28 (s, 1H), 5.83(s, 1H),6.89 (dd, *J*= 2.4 Hz, *J*= 28.8 Hz, 1H), 7.00 (dd, *J*= 1.2 Hz, *J*= 6.4 Hz, 1H), 7.04(dd, *J*= 1.2 Hz, *J*= 6.0 Hz, 1H), 7.17(dd, *J*= 3.6 Hz, *J*= 2.8 Hz, 1H), 7.22(dd, *J*= 2.4 Hz, *J*= 2.0 Hz, 1H), 7.29(dd, *J*= 2.4 Hz, *J*= 3.2 Hz, 1H) ppm; 13C-APT (CDCl3, 100 MHZ): δ = 19.5, 31.1, 50.9, 103.7, 111.1, 111.6, 118.3, 119.2, 120.0, 121.4, 121.9, 122.7, 123.0, 123.5, 124.3, 126.2, 136.2, 143.5, 168.4, 185.3 ppm; IR (neat) ν=3371, 2932, 2847, 2361, 1744, 1636, 1126, 1026,756 cm-1; LCMS (M/z) = 339.9, 337.2, 243.3, 242.3, 199.8, 169.9, 144.2, 106.8, 102.0; Anal. Calcd for C19H20N2O4: C, 67.05; H, 5.92; N, 8.23; O, 18.80. Found: C, 66.95; H, 6.02; N, 8.12; O, 18.64;

*Diethyl-1,4-dihydro-4-(1H-indol-3-yl)-2,6-dimethyl pyridine-3,5-dicarboxylate* (**4b**): Prepared from Indole-3-carboxaldehyde(1mmol), ethyl acetoacetate (2mmol) and ammonium acetate (1mmol), ethanol (10ml) and L-Proline 0.1mmol (10%); produced in pure form; Yield: 73 % (0.269g); light yellow solid; mp: 140-145 0C; Rf value: (n-hexane: ethylacetate, 4:1) 0.59; 1H-NMR (CDCl3 , 400 MHZ); δ = 1.18 (t, *J*= 7.2 Hz, 6H) , 2.34 (s, 6H), 4.07 (q, *J*= 7.2 Hz, *J*= 6.8 Hz, 4H), 5.39 (s, 1H), 5.95 (s, 1H), 7.01 (s, 1H), 7.08 (dd, *J*= 1.2 Hz, *J*= 6.8 Hz, 1H), 7.31 (dd, *J*= 2.8 Hz, *J*= 1.6 Hz, 1H), 7.33 (d, *J*= 0.8 Hz, 1H), 7.40 (dd, *J*= 3.2 Hz, *J*= 1.2 Hz, 1H), 7.71 (d, *J*= 7.2 Hz, 1H) ppm; 13C-APT (CDCl3, 100MHZ); δ = 14.3, 19.5, 31.2, 59.8, 104.0, 111.0, 111.2, 119.1, 120.2, 121.3, 121.8, 122.9, 123.0, 123.1, 124.3, 126.3, 135.9, 136.2, 143.2, 168.1, 185.3 ppm; IR (neat) ν= 3340, 2939, 2831, 2361, 1744, 1650, 1425, 1219, 1126, 1026, 756 cm-1; LCMS (M/z) = 367.3, 365.3, 198.0, 162.7, 135.0, 107.2; Anal. Calcd for C21H24N2O4: C, 68.46; H, 6.57; N, 7.60; O, 17.37. Found: C, 68.21; H, 6.48; N, 7.48; O, 17.24;

*4-(1H-indol-3-yl)-3,5-diacetyl-1,4-dihydro-2,6-dimethyl pyridine* (**4c**): Prepared from Indole-3-carboxaldehyde(1mmol), acetyl acetone (2mmol) and ammonium acetate (1mmol), ethanol(10ml) and L-Proline 0.1mmol (10%); produced in pure form; Yield: 75 % (0.232g); light brown solid; mp: 138-142 0C; Rf value: (n-hexane: ethyl acetate, 4:1) 0.19; 1H-NMR (CDCl3 , 400 MHZ); δ = 2.32 (s, 6H) , 3.61 (s, 6H), 5.35 (s, 1H), 5.91 (s, 1H), 6.96 (d, *J*= 2.4 Hz, 1H), 7.08 (dd, *J*= 1.2 Hz, *J*= 6.8 Hz, 1H), 7.12 (dd, *J*= 1.2 Hz, *J*= 6.0 Hz, 1H), 7.29 (dd, *J*= 2.4 Hz, *J*= 0.8 Hz, 1H), 7.37 (dd, *J*=4.0 Hz, *J*= 1.6 Hz, 1H), 8.00 (s, 1H) ppm; 13C-APT (CDCl3, 100MHZ); δ = 19.5, 31.1, 51.0, 103.8, 111.1, 111.6, 119.2, 120.0, 121.4, 121.9, 122.7, 123.0, 124.3, 126.2, 136.3, 143.5, 168.42, 185.29 ppm; IR (neat) ν= 3387, 3364, 3171, 2939, 2831, 2361, 1636, 1242, 1026, 756 cm-1; LCMS (M/z) = 307.2, 145.2, 144.0; Anal. Calcd for C19H20N2O2: C, 74.00; H, 6.54; N, 9.08; O, 10.38. Found: C, 73.86; H, 6.46; N, 8.98; O, 10.28;

*Diisobutyl-1,4-dihydro-4-(1H-indol-3-yl)-2,6-dimethyl pyridine-3,5-dicarboxylate* (**4d**): Prepared from Indole-3-carboxaldehyde (1mmol), iso-butylacetoacetate (2mmol) and ammonium acetate (1mmol), ethanol(10ml) and L-Proline 0.1mmol (10%); produced in pure form; Yield: 68 % (0.289g); yellowish solid; mp: 185-189 0C; Rf value: (n-hexane: ethyl acetate, 4:1) 0.44; 1H-NMR (CDCl3 , 400 MHZ); δ = 0.84 (d, *J*= 6.4 Hz, 6H) , 0.88 (d, *J*= 6.4 Hz, 6H), 1.85 (q, *J*= 6.8 Hz, 2H), 2.34 (s, 6H), 3.76 (m, 4H), 5.96 (s, 1H), 7.00 (d, *J*= 3.0 Hz, 1H), 7.06 (d, *J*= 1.2 Hz, 1H), 7.09 (dd, *J*= 1.2 Hz, *J*= 6.8 Hz, 1H), 7.30 (dd, *J*= 2.0 Hz, *J*= 1.6 Hz, 1H), 7.38 (dd, *J*= 0.8 Hz, *J*= 3.6 Hz, 1H), 7.68(d, *J*= 20.4 Hz, 1H) 8.29 (d, *J*= 6.0 Hz, 1H) ppm; 13C-APT (CDCl3, 100MHZ): δ = 19.2, 19.3, 19.6, 27.8, 31.3, 70.2, 103.8, 111.0, 111.7, 119.2, 120.2, 121.3, 121.9, 122.6, 122.7, 123.0, 124.3, 126.2, 135.8, 136.3, 143.4, 168.1, 185.3 ppm; IR (neat) ν= 3310, 3163, 3040, 2924, 2854, 2361, 2021, 1921, 1744, 1628,1103, 1026, 756; LCMS (M/z) = 423.3, 421.4; Anal. Calcd for C25H32N2O4: C, 70.73; H, 7.60; N, 6.60; O, 15.07. Found: C, 70.68; H, 7.60; N, 6.45; O, 14.98;

*di-tert-butyl 4-(1H-indol-3-yl)-2,6-dimethylpyridine-3,5-dicarboxylate* (**4o**) Prepared from Indole-3-carboxaldehyde (1mmol), tert- butyl acetoacetate (1mmol), ammonium acetate (1mmol) and L-Proline {0.06 g, 0.1mmol (10%); produced in pure form; Yield: 76% (0.321g); yellow block crystals; mp: 222-226 0C; Rf value: (n-hexane: ethyl acetate, 4:1) 0.46; 1H-NMR (CDCl3 , 400 MHZ); δ = 1.02 (s, 18H), 2.62 (s, 6H), 7.2 (dd, *J*=2.8 Hz, 2H), 7.18 (t, *J*=4.0 Hz, 1H), 7.27 (s, 1H), 7.36 (d, *J*= 8.0 Hz, 1H), 7.46 (d, *J*= 8.0 Hz, 1H), 8.96 (s, 1H) ppm; 13C-APT (CDCl3, 100 MHZ): δ = 167.55, 154.10, 139.26, 135.42, 130.02, 127.21, 123.70, 123.53, 122.44, 120.66, 120.25, 120.04, 119.98, 111.70, 110.98, 110.86, 82.07, 61.23, 27.34, 22.86, 22.60, 13.39 ppm.

6.2.2 Synthesis of 1, 4-DHPS **4(e-g)**.

2-chloro-6-methoxyquinoline-3-carbaldehyde (2C-6MQ-3C) (0.221g, 1mmol) **1**, ammonium acetate (0.077g, 1mmol) **3**, different 1, 3-dione (0.1-0.25g, 2mmol) **2** and L-proline (10 %) as catalyst were added in 10 ml ethanol to 50ml Round bottom flask. The mixture was stirred well for 2-3 hours at 60 0C and cooled to room temperature. The progress of the reaction was monitored by TLC. The reaction mixture was poured into cold water to fall out the product. The product was purified from hot water wash and then treated with n-hexane, after drying the crude Brown/yellow product was recrystallizes from ethanol along with charcoal treatment. The same reaction was also carried out at ambient temperature.

*Dimethyl 4-(2-chloro-6-methoxyquinolin-3-yl)-2,6-dimethyl-1,4-dihydropyridine-3,5-dicarboxylate* (**4e**): Prepared from 2-chloro-6-methoxyquinoline-3-carbaldehyde (1mmol) , methyl acetoacetate (2mmol) and ammonium acetate (1mmol), ethanol (10ml) and L-Proline 0.1mmol (10%); produced in pure form; Yield: 73% (0.304g); light brown solid; mp: 122-125 0C; Rf value: (n-hexane: ethyl acetate, 4:1) 0.46; 1H-NMR (CDCl3 , 400 MHZ); δ = 2.38 (s, 6H), 3.62 (s, 6H), 3.91 (s, 3H), 5.47 (s, 1H), 5.91 (s, 1H), 7.00 (d, *J*= 2.4 Hz, 1H), 7.28 (dd, *J*= 2.8 Hz, *J*= 6.4 Hz, 1H), 7.84(d, *J*= 9.6 Hz, 1H), 8.03(s, 1H) ppm; 13C-APT (CDCl3, 100 MHZ); δ = 19.5, 37.6, 51.00, 55.6, 103.9, 104.7, 122.6, 129.0, 129.4, 138.4, 141.4, 142.3, 144.3, 147.8, 157.8, 167.7 ppm; IR (neat) ν= 3086, 2932, 2361, 1744, 1628, 1122, 1034 cm-1; LCMS (M/z) = 418.3, 415.3; Anal. Calcd for C21H21ClN2O5: C, 60.51; H, 5.08; Cl, 8.50; N, 6.72; O, 19.19. Found: C, 60.34; H, 4.98; N, 6.67; O, 19.14;

*Diethyl 4-(2-chloro-6-methoxyquinolin-3-yl)-2,6-dimethyl-1,4-dihydropyridine-3,5-dicarboxylate* (**4f**): Prepared from 2-chloro-6-methoxyquinoline-3-carbaldehyde (1mmol), ethyl acetoacetate (2mmol) and ammonium acetate (1mmol), ethanol (10ml) and L-Proline 0.1mmol (10%); produced in pure form; Yield: 75% (0.334g); light brown solid; mp: 146-149 0C; Rf value: (n-hexane: ethyl acetate, 4:1) 0.52; 1H-NMR (CDCl3 , 400 MHZ); δ = 1.21 (s, 6H), 2.33 (s, 6H), 3.89 (s, 3H), 4.02 (m, 4H), 5.48 (s, 1H), 6.26 (s, 1H), 7.01 (d, *J*= 2.8 Hz, 1H), 7.28(dd, *J*= 3.6 Hz, *J*= 6.4 Hz, 1H), 7.83 (d, *J*= 9.2 Hz, 1H), 8.06(s, 1H) ppm; 13C-APT (CDCl3, 100MHZ); δ = 9.1, 14.3, 32.9, 50.3, 54.7, 98.2, 99.5, 117.3, 123.6, 124.1, 130.6, 133.6, 135.3, 137.1, 139.2, 142.5, 152.5, 162.2 ppm; IR (neat) ν= 3286, 3232, 2939, 2831, 2355, 1744, 1682, 1497, 1211, 1034, 764 cm-1; LCMS (M/z) = 446.4, 445.3, 443.2, 191.9; Anal. Calcd for C23H25ClN2O5: C, 62.09; H, 5.66; Cl, 7.97; N, 6.30; O, 17.98. Found: C, 62.02; H, 5.48; N, 6.12; O, 17.74;

*Diethyl 4-(2-chloro-6-methoxyquinolin-3-yl)-2,6-dimethyl-1,4-dihydropyridine-3,5-dicarboxylate* (**4g**): Prepared from 2-chloro-6-methoxyquinoline-3-carbaldehyde (1mmol), acetyl acetone (2mmol) and ammonium acetate (1mmol), ethanol (10ml) and L-Proline 0.1mmol (10%); produced in pure form; Yield: 76% (0.292g); light brown solid; mp: 158-162 0C; Rf value: (n-hexane: ethyl acetate, 4:1) 0.26; 1H-NMR (CDCl3 , 400 MHZ); δ = 2.29 (s, 6H), 3.48 (s, 6H), 3.87 (s, 3H), 5.30 (s, 1H), 7.33 (d, *J*= 2.8 Hz, 1H), 7.35 (d, *J*= 2.8 Hz, 1H), 7.38(d, *J*= 2.8 Hz, 1H), 7.75 (d, *J*= 8.8 Hz, 1H), 8.11 (s, 1H) ppm; 13C-APT (CDCl3, 100MHZ); δ = 18.1, 37.0, 50.4, 55.6, 101.6, 105.4, 122.7, 128.7, 128.8, 137.9, 141.5, 141.9, 145.7, 146.8, 157.4, 167.1 ppm; IR (neat) ν= 3310, 3232, 2939, 2831, 2353, 1736, 1227, 1034, 833, 671 cm-1;

6.2.3 Synthesis of 1,4-DHPs **4(h-j).**

6-fluorochroman-2-carbaldehyde (7-FC-2C) (0.180g, 1mmol) **1**, ammonium acetate (0.077g, 1mmol) **2**, different 1, 3-dione (0.1-0.25g, 2mmol) **3** and L-proline (10%) as catalyst were added in 10 ml ethanol to 50 ml Round bottom flask. The mixture was stirred well for 2-3 hours at 60 0C and cooled to room temperature. The progress of the reaction was monitored by TLC. The reaction mixture was poured into cold water to fall out the product. The product was purified from hot water wash and then treated with n-hexane, after drying the crude Brown/yellow product was recrystallized from ethanol along with charcoal treatment. The same reaction was also carried out at ambient temperature.

*dimethyl-4-(7-fluorochroman-2-yl)-1,4-dihydro-2,6-dimethylpyridine-3,5-dicarboxylate* (**4h**): Prepared from 7-fluorochroman-2-carbaldehyde (1mmol), methyl acetoacetate (2mmol) and ammonium acetate (1mmol), ethanol(10ml) and L-Proline 0.1mmol (10%); produce in pure form; Yield: 35% (0.131g); light brown solid; mp: 188-192 0C; Rf value: (n-hexane: ethyl acetate, 4:1) 0.40;

*Diethyl-4-(7-fluorochroman-2-yl)-1,4-dihydro-2,6-dimethylpyridine-3,5-dicarboxylate* (**4i**): Prepared from 7-fluorochroman-2-carbaldehyde (1mmol), ethyl acetoacetate (2mmol) and ammonium acetate (1mmol), ethanol(10ml) and L-Proline 0.1mmol (10%); produced in pure form; Yield: 41%; (0.166g); light brown solid; mp: 212-218 0C; Rf value: (n-hexane: ethyl acetate, 4:1) 0.54;

*4-(7-fluorochroman-2-yl)-3,5-diacetyl-1,4-dihydro-2,6-dimethylpyridine* (**4j**) Prepared from 7-fluorochroman-2-carbaldehyde (1mmol), acetyl acetone (2mmol) and ammonium acetate (1mmol), ethanol(10ml) and L-Proline 0.1mmol (10%); produced in pure form; Yield: 54% (0.186g); light brown solid; mp: 222-228 0C; Rf value: (n-hexane: ethyl acetate, 4:1) 0.48; 1H-NMR (CDCl3 , 400 MHZ); δ = 1.48 (t, *J*= 2.0 Hz, 1H), 1.68 (t, *J*= 2.0 Hz, 1H), 2.18 (s, 3H), 2.19 (s, 3H), 2.21 (s, 3H), 2.26 (s, 3H), 3.55 (d, *J*= 1.6 Hz, 1H), 4.33(d, *J*= 6.4 Hz, 1H), 6.32 (s, 1H), 6.51 (d, *J*= 4.8 Hz, 1H), 6.54 (dd, *J*= 2.4 Hz, *J*= 4.8 Hz, 1H), 6.60 (s, 1H) ppm;13C-APT (CDCl3, 100MHZ); δ = 16.63, 20.13, 22.58, 24.96, 29.54, 40.23, 109.15, 109.51, 113.66, 113.89, 114.96, 115.18, 117.35, 117.43, 122.92, 122.99, 143.35, 144.26, 150.64, 155.41, 157.78 ppm;

Synthesis of 1, 4-DHPs **4(k-n).**

3-methylthiophene-2-carbaldehyde (3-MT-2-C) (0.126 g, 0.001mol), ammonium acetate (0.077g, 0.001mol), different 1,3-dione (0.1-0.25g, 0.002 mmol) and L-proline (10%) were added to 50ml Round bottom flask. The mixture was stirred well for 2-3 hours at 60 0C and cooled to room temperature. The progress of the reaction was monitored by TLC. The reaction mixture was poured into cold water to fall out the product. The product was purified from hot water wash and then treated with n-hexane, after drying the crude Brown/yellow product was recrystallized from ethanol along with charcoal treatment. The same reaction was also carried out at ambient temperature.

*dimethyl 1,4-dihydro-2,6-dimethyl-4-(3-methylthiophene-2-yl)pyridine-3,5-dicarboxylate* (**4k**) Prepared from 3-methylthiophene-2-carboxaldehyde (1mmol), methyl acetoacetate (1mmol) and ammonium acetate (1mmol) and L-Proline 0.1mmol (10%); produced in pure form; Yield: 88% (0.283g); light yellow solid; mp: 145-148 OC; Rf value: (n-hexane: ethyl acetate, 4:1) 0.44; 1H-NMR (CDCl3 , 400 MHZ); δ = 2.31 (s, 3H), 2.34 (s, 6H), 3.68 (s, 6H), 5.35 (s, 1H), 5.94 (s, 1H), 6.64 (d, *J*= 4.8 Hz, 1H), 6.93 (d, *J*= 5.2 Hz, 1H) ppm; 13C-APT (CDCl3, 100MHZ); δ = 13.7, 19.4, 33.0, 51.0, 104.1, 121.6, 129.1, 132.5, 144.0, 146.2, 168.0 ppm; IR (neat) ν= 3742, 2955, 2361, 1744, 1682, 1643, 1497, 1435, 1381, 1335, 1257, 1219, 1126, 1049, 1018, 841, 787, 525 cm-1; LCMS (M/z) = 322.3, 320.2, 320.0, 102.0; Anal. Calcd for C16H19NO4S: C, 59.79; H, 5.96; N, 4.36; O, 19.91; S, 9.98. Found: C, 59.59; H, 5.76; N, 4.29; O, 19.86;

*diethyl 1,4-dihydro-2,6-dimethyl-4-(3-methylthiophene-2-yl)pyridine-3,5-dicarboxylate* (**4l**) Prepared from 3-methylthiophene-2-carboxaldehyde (1mmol), ethyl acetoacetate (1mmol) and ammonium acetate (1mmol) and L-Proline 0.1mmol (10%); produced in pure form; Yield: 92% (0.321g); light yellow solid; mp: 154-158 OC; Rf value: (n-hexane: ethyl acetate, 4:1) 0.40; 1H-NMR (CDCl3 , 400 MHZ); δ = 1.25 (t, *J*= 7.2 Hz, 6H), 2.32 (s, 3H), 2.34 (s, 3H), 4.13 (q, *J*= 7.2 Hz, 4H), 5.36 (s, 1H), 5.91 (s, 1H), 6.63 (d, *J*= 5.2 Hz, 1H), 6.93 (d, *J*= 5.2 Hz, 1H) ppm; 13C -APT (CDCl3, 100MHZ); δ = 13.7, 14.3, 15.9, 19.5, 22.9, 32.9, 34.4, 59.8, 104.4, 118.4, 121.6, 125.5, 129.1, 132.3, 143.7, 146.3, 167.4 ppm; IR (neat) ν= 3340, 2978, 2870, 2816, 2361, 1728, 1690, 1643, 1558, 1481, 1373, 1296, 1203, 1103, 1041, 849, 787, 656, 609 cm-1; LCMS (M/z) = 350.3, 348.2, 101.9; Anal. Calcd for C18H23NO4S: C, 61.87; H, 6.63; N, 4.01; O, 18.31; S, 9.18. Found: C, 61.67; H, 6.57; N, 3.88; O, 18.15;

*dimethyl1,4-dihydro-2,6-dimethyl-4-(3-methylthiophene-2-yl)pyridine-3,5-dicarboxylate* (**4m**) Prepared from 3-methylthiophene-2-carboxaldehyde (1mmol), acetyl acetone (1mmol) and ammonium acetate (1mmol) and L-Proline 0.1mmol (10%); produced in pure form; Yield: 86% (0.185g); light yellow solid; mp: 126-130 OC; Rf value: (n-hexane: ethyl acetate, 4:1) 0.46; 1H-NMR (CDCl3 , 400 MHZ); δ = 2.30 (s, 6H), 2.33 (s, 3H), 2.36 (s, 3H), 5.40 (s, 1H), 6.13 (s, 1H), 6.65 (d, *J*= 4.8 Hz, 1H), 6.94 (d,  *J*= 4.8 Hz, 1H) ppm; 13C -APT (CDCl3,100MHZ); δ = 14.5, 20.4, 30.1, 33.9, 35.5, 114.5, 119.1, 122.1, 129.7, 131.9, 142.4, 145.3 ppm; IR (neat) ν= 3286, 3078, 3009, 2970, 2916, 2847, 2361, 1705, 1666, 1582, 1358, 1211, 1103, 1018, 725 cm-1; LCMS (M/z) = 289.2, 288.1, 191.2, 190.0; Anal. Calcd for C16H19NO2S: C, 66.41; H, 6.62; N, 4.84; O, 11.06; S, 11.08. Found: C, 66.24; H, 6.59; N, 4.71; O, 11.08;

*di-tert-butyl1,4-dihydro-2,6-dimethyl-4-(3-methylthiophene-2-yl)pyridine-3,5-dicarboxylate* (**4n**) Prepared from 3-methylthiophene-2-carboxaldehyde (1mmol), tert-butyl acetoacetate (1mmol) and ammonium acetate (1mmol) and L-Proline 0.1mmol (10%); produced in pure form; Yield: 81%; light yellow solid; mp: 146-149 OC; Rf value: (n-hexane: ethyl acetate, 4:1) 0.52; 1H-NMR (CDCl3 , 400 MHZ); δ = 1.46 (s, 18H), 1.60 (s, 3H), 2.28 (s, 6H), 5.34 (s, 1H), 5.64 (s, 1H), 6.64 (d, *J*= 5.2 Hz, 1H), 6.92 (d, *J*= 4.8 Hz, 1H) ppm; 13C -APT (CDCl3, 100MHZ); δ = 14.5, 19.5, 28.3, 28.4, 33.5, 79.8, 105.3, 121.2, 129.5, 131.9, 142.2, 145.9, 166.9 ppm; IR (neat) ν= 3448, 3333, 3240, 3070, 3009, 2970, 2962, 2847, 2361, 1736, 1643, 1443, 1366, 1227, 733 cm-1; LCMS (M/z) = 289.1, 288.2, 288, 191.2, 190.2, 190.0; Anal. Calcd for C22H31NO4S: C, 65.15; H, 7.70; N, 3.45; O, 15.78; S, 7.91. Found: C, 65.05; H, 7.61; N, 3.34; O, 15.68;

**6.3** **CELL VIABILITY ASSAY**

The synthesized compounds were dissolved in dimethyl sulfoxide (DMSO). The cells were seeded in 96-well plates at a density of 5 × 103 cells/ well 24 hrs after plating; cells were washed twice with 500 µl of serum-free medium and starved by incubating the cells in serum-free medium for an hour at 370C. After starvation, cells were treated with the complex at concentrations ranging from 10, 50 and 100 µM, for 24 and 48 hrs, with DMSO as the solvent control and Doxorubicin as the positive control. At the end of the exposure period, the cells were incubated with 20 μL 3-(4,5-dimethylthiazol-2-yl)-2,5-diphenyl-2H-tetrazolium bromide (MTT), and the plates were wrapped with aluminum foil and incubated for another 4 h. Then, the culture medium was aspirated, and 100 μL of DMSO was added to dissolve the formazan product. The absorbance was monitored at 492 nm (measurement) and 650 nm (reference) using a microplate reader (Bio-Rad, Hercules, CA, USA). Data were collected for triplicates of each compound to calculate the respective means and the standard deviations. The percentage inhibition was calculated, from this data, using the formula:

% inhibition = ((Mean OD of untreated cells (control) − Mean OD of treated cells) /Mean OD of untreated cells (control)) × 100

The IC50 value was determined as the concentration of the complex that is required to reduce the absorbance to half that of the control.

The MTT assay experiment was repeated 3 times at least.

**6.3.1. ETHIDIUM BROMIDE/ACRIDINE ORANGE STAINING (AO/EB STAINING OR DUAL STAINING)**

A549 cells were plated at a density of 5 x 104 in 6 well plates containing sterile coverslips. They were allowed to grow at 37ºC in a humidified CO2 incubator until they are 70 - 80% confluent.

Then cells were treated with synthesized (50µM) for 24hrs. The culture medium was aspirated from each well and the cells were gently rinsed twice with PBS at room temperature. Then the coverslips were taken and kept on glass slides and stained with 100 µl of dye mixture (1:1 of EB and AO), immediately viewed under the fluorescence microscope.

Viable cells had green fluorescent nuclei with an organized structure. The early apoptotic cells had yellow chromatin in nuclei that were highly condensed or fragmented. Apoptotic cells also exhibited membrane blebbing. The late apoptotic cells had orange chromatin with nuclei that were highly condensed and fragmented. The necrotic cells had bright orange chromatin in round nuclei. Only cells with yellow, condensed, or fragmented nuclei were counted as apoptotic cells in a blinded, nonbiased manner. For each sample, random 300 cells were observed in a fluorescent microscope (EVOS FL Cell Imaging System, Thermo Fisher Scientific, USA) and observed at x400 magnification at least 500 cells/well and 4 wells/condition were counted, and the percentage of apoptotic cells was determined [% of apoptotic cells = (total number of apoptotic cells/total number of cells counted) x 100]. Dual acridine orange/ethidium bromide (AO/EB) staining method was repeated 3 times at least.

**6.3.2 Effects of compounds on eukaryotic models.**

Biological properties of these compounds were checked on Yeast *Saccharomyces cerevisiae* which is most popular model organism for biomedical studies.

**6.3.3 *In vitro* toxicology study of synthesized compounds**

Yeast (*Saccharomyces cerevisiae*) is most popular eukaryotic model system([Botstein, Chervitz, and Cherry 1997](#_ENREF_1)). Hence, the *in vitro* toxicity study was carried out in a yeast model *Saccharomyces cerevisiae.* For evaluating toxic effects of the compounds on yeast cells, three experiments were taken into accounts which include % viability of cells after treatment, concentration of H2O2 produced and released by the cells after treatment and genotoxic effect by assessing DNA damage caused by test compounds.

**6.3.3.1 Cellular level bioassay**

For viability determination, cells were cultured on yeast peptone dextrose media (composition: yeast extract-1%, Peptone-2% and Dextrose-2%) at 30oC on shaking condition. After 12-16 hours of growth, yeast culture was treated with synthesized compounds in gradient concentration ranging from 20-100 µg/ml. after 8-10 hours cells were harvested by centrifugation, washed with Phosphate buffer saline and subjected for viable staining with methylene blue. After staining, dead cells were in dark blue color whereas live cells were remained unstained or colorless which were counted by Hemocytometer. The result will be represented as % viability. Higher % viability indicates lower toxicity of compound on that particular biological system.

**6.3.3.2 Reactive oxygen species production**

The amount of H2O2 was quantified as described in literature([Loreto and Velikova 2001](#_ENREF_3)). In the process, treated cultures were centrifuged at 5000 rpm for 5min was used for H2O2 determination. The reaction system consists of, 0.5 ml supernatant added to 0.5 ml of 10 mM phosphate buffer (pH 7.0) and 1.0 ml of 1 M KI. After completion of reaction, absorbance measured for 1 min at 390 nm and results were expressed as µg/ml H2O2/ml of culture.

**6.3.3.3 Effects of compound on integrity of DNA (Genotoxicity)**

Cellular DNA was extracted according to the protocol described by Sambrook.([Green and Sambrook 2018](#_ENREF_2), [Sambrook and Russell 2006](#_ENREF_4)) Which is utilized for electrophoresis 0.8 % agarose gel at 80-100 volts? After completion of electrophoresis, the gel image was observed using an instrument AlphaDigiDoc™ RT. v.5.2.1 PC–image software. The appearance of smearing in the DNA represents the DNA integrity of the compound. The degree of smearing is proportional to the damage caused by the compound which ultimately shows the toxicological property of that particular compound.

**References:**

Botstein, D., S. A. Chervitz, and M. Cherry. 1997. Yeast as a model organism. *Science* 277 (5330):1259-1260.

Green, M. R., and J. Sambrook. 2018. Isolation and Quantification of DNA. *Cold Spring Harbor Protocols* 2018 (6):pdb. top093336.

Loreto, F., and V. Velikova. 2001. Isoprene produced by leaves protects the photosynthetic apparatus against ozone damage, quenches ozone products, and reduces lipid peroxidation of cellular membranes. *Plant Physiology* 127 (4):1781-1787.

Sambrook, J., and D. W. Russell. 2006. Rapid isolation of yeast DNA. *Cold Spring Harbor Protocols* 2006 (1):pdb. prot4039.
